# Supplementary material
Source: publisher figshare collection journal article supplement (https://acs.figshare.com/ndownloader/files/28386244)
Supplement: Supplementary file 1 [file 28386244]

## ELECTRONIC SUPPORTING INFORMATION FOR

### Chiral Cobalt(III) tris(1,2-Diamine) Catalysts that Incorporate Nitrogenous Base Containing Anions for the Bifunctional Activation of Nucleophiles and Electrophiles in Enantioselective Addition Reactions

Connor Q. Kabes,<sup>●</sup> Reagan F. Lucas, Jack H. Gunn, and John A. Gladysz<sup>\*●</sup>

Department of Chemistry, Texas A&M University, P.O. Box 30012, College Station, Texas  
77842-3012, USA.

E-mail: [gladysz@mail.chem.tamu.edu](mailto:gladysz@mail.chem.tamu.edu)

#### Contents

|                                                                                               |     |
|-----------------------------------------------------------------------------------------------|-----|
| General Information.....                                                                      | s2  |
| Syntheses of nitroolefin substrates .....                                                     | s2  |
| Syntheses of catalysts .....                                                                  | s3  |
| Nitroolefin addition products accessed by the general procedure .....                         | s9  |
| Di- <i>t</i> -butyl azodicarboxylate addition products accessed by the general procedure..... | s13 |
| References.....                                                                               | s15 |
| NMR spectra of catalysts .....                                                                | s17 |
| HPLC Traces.....                                                                              | s28 |

## General Information

All operations were carried out under air atmospheres. NMR spectra were recorded on standard FT spectrometers at ambient probe temperatures (500 MHz) or 298 K (400 MHz). Chemical shifts ( $\delta$ /ppm) were generally referenced to solvent signals:  $^1\text{H}$ , residual  $\text{CHCl}_3$  (7.26), acetone- $d_5$ , (2.05), or  $\text{CHD}_2\text{CN}$  (1.94);  $^{13}\text{C}$ ,  $\text{CDCl}_3$  (77.16) or acetone- $d_6$  (29.84). IR spectra were recorded on a Shimadzu IRAffinity-1 spectrometer (Pike MIRacle ATR system, diamond/ZnSe crystal). Capillary thermolyses were monitored with an Optimize MPA 100 instrument. Microanalyses were conducted by Atlantic Microlab. HPLC analyses were carried out with a Shimadzu instrument package (pump/autosampler/detector LC-20AD/SIL-20A/SPD-M20A).

The di-*t*-butyl azodicarboxylate (98%, Aldrich) was recrystallized from heptane (warm until dissolved) and petroleum ether (30-60 °C; added cold and sample kept at room temperature until precipitation). The (*E*)-cinnamaldehyde, 4-formylbenzoic acid methyl ester, nicotinic acid, 2-methoxynicotinic acid, 6-aminonicotinic acid, 6-chloronicotinic acid, 6-methylnicotinic acid, isonicotinic acid, picolinic acid, 3-(dimethylamino)benzoic acid, 2-pyridinesulfonic acid, ammonium acetate, *N,N*-dimethylaniline, dimethyl malonate, diethyl malonate, di-*t*-butyl malonate,  $\text{Ph}_2\text{SiMe}_2$ , *trans*- $\beta$ -nitrostyrene, and routine chemicals not specifically noted were used as received from common commercial sources.

## Syntheses of nitroolefin substrates

Nitroolefins **6a-d** and **6h-k** were used from a previous work, in which they were prepared by Henry reactions with nitromethane.<sup>s1</sup> Nitroolefins **6f,n** were available commercially, and **6e,l,m** were synthesized by literature procedures.<sup>s2</sup>

***trans*-*p*-(methoxycarbonyl)- $\beta$ -nitrostyrene (6g).**<sup>s3</sup> A round-bottom flask was charged with 4-formylbenzoic acid methyl ester (0.250 g, 1.52 mmol, 1.0 equiv), nitromethane (1.5 mL), and ammonium acetate (0.035 g, 0.457 mmol, 30 mol%). The mixture was refluxed (2 h) and allowed to cool. The thick slurry was transferred to a sintered glass frit, and the solvent was pulled through by vacuum. The residue was triturated with a minimal amount of methanol, and

the solid transferred to a vial and dried by oil pump vacuum (rt, 14 h) to give **6g** as a yellow-green solid (0.124 g, 0.598 mmol, 39%), mp 178.4-181.8 °C (open capillary). IR (powder film,  $\text{cm}^{-1}$ ): 3103, 3051, 2959, 1710, 1635, 1517, 1497, 1281, 1105, 960, 770.

NMR ( $\text{CDCl}_3$ ,  $\delta/\text{ppm}$ ):  $^1\text{H}$  (400 MHz) 8.11 (d,  $^3J_{\text{HH}} = 8.4$  Hz, 2H), 8.02 (d,  $^3J_{\text{HH}} = 13.7$  Hz, 1H), 7.62 (d,  $^3J_{\text{HH}} = 13.7$  Hz, 1H), 7.62 (d,  $^3J_{\text{HH}} = 8.3$  Hz, 2H), 3.95 (s, 3H);  $^{13}\text{C}\{^1\text{H}\}$  (100 MHz) 166.1, 138.8, 137.7, 134.3, 133.2, 130.6, 129.1, 52.7 (8  $\times$  s).

**(1*E*,3*E*)-1-phenyl-4-nitro-1,3-butadiene (6o)**. A round-bottom flask was charged with (*E*)-cinnamaldehyde (0.25 mL, 2.0 mmol, 1.0 equiv), nitromethane (1.5 mL), and ammonium acetate (0.046 g, 0.595 mmol, 30 mol%). The mixture was refluxed (2 h) and allowed to cool. The solvent was removed by rotary evaporation. The red oily residue was dissolved in a minimum of DCM, and loaded onto a silica column that was packed and eluted with EtOAc/hexanes (15:85 v/v). The solvent was removed from the combined product containing fractions by rotary evaporation and oil-pump vacuum (rt, 14 h) to give **6o** as an oily residue that slowly became a vermillion semi-solid (0.174 g, 1.00 mmol, 50%).<sup>s4</sup>

NMR ( $\text{CDCl}_3$ ,  $\delta/\text{ppm}$ ):  $^1\text{H}$  (500 MHz) 7.78 (ddd,  $^3J_{\text{HH}} = 13.0$ , 11.6 Hz,  $^4J_{\text{HH}} = 0.7$  Hz, 1H), 7.55-7.47 (m, 2H), 7.44-7.37 (m, 3H), 7.24 (d,  $^3J_{\text{HH}} = 13.1$  Hz, 1H), 7.16 (d,  $^3J_{\text{HH}} = 15.5$  Hz, 1H), 6.87 (ddd,  $^3J_{\text{HH}} = 15.5$ , 11.6 Hz,  $^4J_{\text{HH}} = 0.6$  Hz, 1H);  $^{13}\text{C}\{^1\text{H}\}$  (100 MHz) 146.2, 139.3, 138.8, 135.3, 130.5, 129.2, 127.9, 120.7 (8  $\times$  s).

## Syntheses of catalysts

**$\Lambda$ -(*S,S*)- $2^{3+}$   $4a\text{-Cl}^-\text{BAr}_f^-\cdot 2\text{H}_2\text{O}$** . Isolated according to the general procedure (main text) from  $\Lambda$ -(*S,S*)- $2^{3+}$   $2\text{Cl}^-\text{BAr}_f^-\cdot 2\text{H}_2\text{O}$  and isonicotinic acid (0.011 g) as an orange solid (0.048 g, 0.027 mmol, 91%), mp 125.7-129.6 °C (open capillary, dec to green liquid). Anal. Calcd. for  $\text{C}_{80}\text{H}_{64}\text{BClCoF}_{24}\text{N}_7\text{O}_2\cdot 2\text{H}_2\text{O}$  (1752.62): C 54.83, H 3.91, N, 5.59; found C 54.98, H 3.91, N 5.36. IR (powder film,  $\text{cm}^{-1}$ ): 3068, 1681, 1609, 1539, 1385, 1354, 1273, 1119, 679.

NMR (acetone- $d_6$ ,  $\delta/\text{ppm}$ ):<sup>s5</sup>  $^1\text{H}$  (500 MHz) isonicotinate at 8.69-8.63 (d,  $^3J_{\text{HH}} = 5.8$  Hz, 2H), 7.92-7.86 (d,  $^3J_{\text{HH}} = 5.8$  Hz, 2H);  $\text{BAr}_f^-$  at 7.84-7.77 (m, 8H, *o*), 7.68 (s, 4H, *p*); dpen at

8.54 (br s, 4H,  $\text{NHH}'$ , overlapping isonicotinate), 7.63-7.46 (m, 12H), 7.36-7.16 (m, 18H), 5.26 (br s, 4H,  $\text{NHH}'$ ), 5.17 (br s, 6H,  $\text{CHNH}_2$ );  $^{13}\text{C}\{^1\text{H}\}$  (125 MHz)  $\text{BAr}_f^-$  at 162.6 (q,  $^1J_{\text{BC}} = 50.0$  Hz,  $i$ ), 135.5 (br s,  $o$ ), 130.0 (qq,  $^2J_{\text{CF}} = 31.5$  Hz,  $^4J_{\text{CF}} = 2.9$  Hz,  $m$ ), 125.4 (q,  $^1J_{\text{CF}} = 271.6$  Hz,  $\text{CF}_3$ ), 118.4 (sept,  $^3J_{\text{CF}} = 4.0$  Hz,  $p$ ); dpen at 137.6 (s,  $i$ -Ph), 129.8, 129.7, 129.6 ( $3 \times$  s,  $o$ -,  $m$ -,  $p$ -Ph), 63.5 (s,  $\text{CHNH}_2$ ); isonicotinate at 172.8 (s,  $\text{COO}^-$ ), 150.7, 145.9, 124.2 ( $5 \times$  s).

$\Lambda$ -( $S,S$ )- $2^{3+}$   $4b\text{-Cl-BAr}_f^- \cdot 2\text{H}_2\text{O}$ . Isolated according to the general procedure from  $\Lambda$ -( $S,S$ )- $2^{3+}$   $2\text{Cl-BAr}_f^- \cdot 2\text{H}_2\text{O}$  and nicotinic acid (0.011 g) as an orange solid (0.046 g, 0.026 mmol, 88%), mp 119.1-122.2 °C (open capillary, dec to green liquid). Anal. Calcd. for  $\text{C}_{80}\text{H}_{64}\text{BClCoF}_{24}\text{N}_7\text{O}_2 \cdot 2\text{H}_2\text{O}$  (1752.62): C 54.83, H 3.91, N, 5.59, Cl, 2.00; found C 54.56, H 3.98, N 5.39. IR (powder film,  $\text{cm}^{-1}$ ): 3063, 1609, 1539, 1387, 1354, 1275, 1119.

NMR (acetone- $d_6$ ,  $\delta/\text{ppm}$ ):  $^1\text{H}$  (500 MHz) nicotinate at 9.24 (dd,  $^4J_{\text{HH}} = 2.1$  Hz,  $^5J_{\text{HH}} = 0.9$  Hz, 1H), 8.65 (dd,  $^3J_{\text{HH}} = 4.8$  Hz,  $^4J_{\text{HH}} = 1.8$  Hz, 1H), 8.34 (dt,  $^3J_{\text{HH}} = 7.7$  Hz,  $^4J_{\text{HH}} = 2.0$  Hz, 1H), 7.40 (ddd,  $^3J_{\text{HH}} = 7.7$  Hz, 4.8 Hz,  $^5J_{\text{HH}} = 0.9$ , 1H);  $\text{BAr}_f^-$  at 7.85-7.78 (m, 8H,  $o$ ), 7.70 (s, 4H,  $p$ ); dpen at 8.68 (br s, 5H,  $\text{NHH}'$ , overlapping nicotinate), 7.62-7.46 (m, 12H), 7.35-7.22 (m, 18H), 5.25 (br s, 5H,  $\text{NHH}'$ ), 5.18 (s, 6H,  $\text{CHNH}_2$ );  $^{13}\text{C}\{^1\text{H}\}$  (125 MHz)  $\text{BAr}_f^-$  at 162.6 (q,  $^1J_{\text{BC}} = 50.0$  Hz,  $i$ ), 135.5 (br s,  $o$ ), 130.0 (qq,  $^2J_{\text{CF}} = 31.5$  Hz,  $^4J_{\text{CF}} = 2.9$  Hz,  $m$ ), 125.4 (q,  $^1J_{\text{CF}} = 271.9$  Hz,  $\text{CF}_3$ ), 118.4 (sept,  $^3J_{\text{CF}} = 4.0$  Hz,  $p$ ); dpen at 137.6 (s,  $i$ -Ph), 129.72, 129.71, 129.6 ( $3 \times$  s,  $o$ -,  $m$ -,  $p$ -Ph), 63.5 (s,  $\text{CHNH}_2$ ); nicotinate at 173.1 (s,  $\text{COO}^-$ ), 152.1, 151.8, 137.4, 133.7, 123.6 ( $5 \times$  s);  $^{19}\text{F}\{^1\text{H}\}$  (470 MHz,  $\text{CDCl}_3$  vs. internal  $\text{C}_6\text{H}_5\text{CF}_3$  at  $-63.72$ )  $-63.2$  (s).

$\Delta$ -( $S,S$ )- $2^{3+}$   $4b\text{-Cl-BAr}_f^- \cdot 2\text{H}_2\text{O}$ . Isolated according to the general procedure from  $\Delta$ -( $S,S$ )- $2^{3+}$   $2\text{Cl-BAr}_f^- \cdot \text{H}_2\text{O}$  and nicotinic acid (0.011 g) as an orange solid (0.051 g, 0.029 mmol, 88%), mp 117.5 °C (open capillary; dec to green liquid with gradual darkening at lower temperatures). Anal. Calcd. for  $\text{C}_{80}\text{H}_{64}\text{BClCoF}_{24}\text{N}_7\text{O}_2 \cdot 2\text{H}_2\text{O}$  (1752.62): C 54.83, H 3.91, N, 5.59; found C 55.38, H 4.08, N 5.70. IR (powder film,  $\text{cm}^{-1}$ ): 3067, 1684, 1596, 1457, 1382, 1354, 1275, 1120, 682.

NMR (acetone- $d_6$ ,  $\delta/\text{ppm}$ ):  $^1\text{H}$  (500 MHz) nicotinate at 9.14 (apparent s, 1H), 8.59 (dd,  $^3J_{\text{HH}} = 5.0$  Hz,  $^4J_{\text{HH}} = 1.8$  Hz, 1H), 8.23 (d,  $^3J_{\text{HH}} = 7.7$  Hz, 1H), 7.36-7.29 (m, 1H);  $\text{BAr}_f^-$  at

7.82-7.74 (m, 8H, *o*), 7.68 (s, 4H, *p*); dpen at 7.87 (br s, 1H, NHH', overlapping nicotinate), 7.58-7.46 (m, 12H), 7.28-7.13 (m, 18H), 5.98 (br s, 1H, NHH'), 5.08 (s, 6H, CHNH<sub>2</sub>); <sup>13</sup>C{<sup>1</sup>H} (125 MHz) BAr<sub>f</sub><sup>-</sup> at 162.6 (q, <sup>1</sup>J<sub>BC</sub> = 49.8 Hz, *i*), 135.5 (br s, *o*), 130.0 (qq, <sup>2</sup>J<sub>CF</sub> = 31.5 Hz, <sup>4</sup>J<sub>CF</sub> = 2.9 Hz, *m*), 125.3 (q, <sup>1</sup>J<sub>CF</sub> = 271.8 Hz, CF<sub>3</sub>), 118.4 (sept, <sup>3</sup>J<sub>CF</sub> = 4.0 Hz, *p*); dpen at 137.7 (s, *i*-Ph), 129.6, 129.4, 129.2 (3 × s, *o*-, *m*-, *p*-Ph), 66.0 (s, CHNH<sub>2</sub>); nicotinate at<sup>s6</sup> 152.0, 151.5, 137.2, 129.7, 123.6 (5 × s).

**Λ-(*S,S*)-2<sup>3+</sup> 4c-Cl-BAr<sub>f</sub><sup>-</sup>.** Isolated according to the general procedure from Λ-(*S,S*)-2<sup>3+</sup> 2Cl-BAr<sub>f</sub><sup>-</sup>·2H<sub>2</sub>O and picolinic acid (0.011 g) as an orange solid (0.051 g, 0.029 mmol, 98%), mp 129.9 °C (open capillary; dec to green liquid with gradual darkening at lower temperatures). Anal. Calcd. for C<sub>80</sub>H<sub>64</sub>BClCoF<sub>24</sub>N<sub>7</sub>O<sub>2</sub> (1716.59): C 55.98, H 3.76, N, 5.71; found C 56.27, H 3.88, N 5.71. IR (powder film, cm<sup>-1</sup>): 3029, 1609, 1579, 1549, 1387, 1354, 1274, 1118, 696.

NMR (acetone-*d*<sub>6</sub>, δ/ppm):<sup>s5</sup> <sup>1</sup>H (500 MHz) picolinate at 8.66 (br s, 1H), 8.15 (d, <sup>3</sup>J<sub>HH</sub> = 7.8 Hz, 1H), 7.85 (t, <sup>3</sup>J<sub>HH</sub> = 7.7 Hz, 1H), 7.43-7.35 (m, 1H); BAr<sub>f</sub><sup>-</sup> at 7.83-7.79 (m, 8H, *o*), 7.69 (br s, 4H, *p*); dpen at 8.40 (br s, 4H, NHH'), 7.57-7.44 (m, 12H), 7.31-7.09 (m, 18H), 5.68 (br s, 4H, NHH'), 5.15 (s, 6H, CHNH<sub>2</sub>); <sup>13</sup>C{<sup>1</sup>H} (125 MHz) BAr<sub>f</sub><sup>-</sup> at 162.6 (q, <sup>1</sup>J<sub>BC</sub> = 50.0 Hz, *i*), 135.5 (br s, *o*), 130.0 (qq, <sup>2</sup>J<sub>CF</sub> = 31.5 Hz, <sup>4</sup>J<sub>CF</sub> = 2.9 Hz, *m*), 125.3 (q, <sup>1</sup>J<sub>CF</sub> = 271.8 Hz, CF<sub>3</sub>), 118.4 (sept, <sup>3</sup>J<sub>CF</sub> = 4.0 Hz, *p*); dpen at 137.6 (s, *i*-Ph), 129.63 (double intensity), 129.58, (2 × s, *o*-, *m*-, *p*-Ph), 63.6 (s, CHNH<sub>2</sub>); picolinate at 172.7 (s, COO<sup>-</sup>), 156.5, 149.7, 137.3, 125.4, 125.1 (5 × s).

**Λ-(*S,S*)-2<sup>3+</sup> 4d-Cl-BAr<sub>f</sub><sup>-</sup>·2H<sub>2</sub>O.** Isolated according to the general procedure from Λ-(*S,S*)-2<sup>3+</sup> 2Cl-BAr<sub>f</sub><sup>-</sup>·2H<sub>2</sub>O and pyridine-2-sulfonic acid (0.014 g) as an orange solid (0.051 g, 0.029 mmol, 96%), mp 126.4-136.7 °C (open capillary; dec to green liquid). Anal. Calcd. for C<sub>79</sub>H<sub>64</sub>BClCoF<sub>24</sub>N<sub>7</sub>O<sub>3</sub>S·2H<sub>2</sub>O (1788.67): C 53.05, H 3.83, N, 5.48; found C 53.31, H 3.73, N 5.39. IR (powder film, cm<sup>-1</sup>): 3216, 3079, 1610, 1457, 1354, 1274, 1118, 1024, 681.

NMR (acetone-*d*<sub>6</sub>, δ/ppm):<sup>s5</sup> <sup>1</sup>H (500 MHz) 2-pyridinesulfonate at 8.55 (d, <sup>3</sup>J<sub>HH</sub> = 4.7 Hz, 1H), 8.10-7.99 (m, 2H), 7.56-7.48 (m, 1H); BAr<sub>f</sub><sup>-</sup> at 7.81-7.78 (m, 8H, *o*), 7.67 (s, 4H, *p*); dpen at ca. 7.5 (NHH', overlapping Ar-CH, 2H), 7.49-7.39 (m, 12H), 7.31-7.12 (m, 18H), 5.25

(br s, 4H,  $\text{NHH}'$ ), 5.05 (s, 6H,  $\text{CHNH}_2$ );  $^{13}\text{C}\{^1\text{H}\}$  (125 MHz)  $\text{BAr}_f^-$  at 162.6 (q,  $^1J_{\text{BC}} = 50.0$  Hz,  $\lambda$ ), 135.5 (br s,  $o$ ), 130.0 (qq,  $^2J_{\text{CF}} = 31.5$  Hz,  $^4J_{\text{CF}} = 2.9$  Hz,  $m$ ), 125.4 (q,  $^1J_{\text{CF}} = 274.5$  Hz,  $\text{CF}_3$ ), 118.4 (sept,  $^3J_{\text{CF}} = 4.0$  Hz,  $p$ ); dpen at 136.9 (s,  $i$ -Ph), 129.8, 129.64, 129.62 ( $3 \times$  s,  $o$ -,  $m$ -,  $p$ -Ph), 63.4 (s,  $\text{CHNH}_2$ ); 2-pyridinesulfonate at 162.7, 150.2, 139.2, 126.1, 121.8 ( $6 \times$  s).

**$\Lambda$ -( $S,S$ )- $2^{3+}$   $4e^- \text{Cl}^- \text{BAr}_f^- \cdot 2\text{H}_2\text{O}$ .** Isolated according to the general procedure from  $\Lambda$ -( $S,S$ )- $2^{3+}$   $2\text{Cl}^- \text{BAr}_f^- \cdot 2\text{H}_2\text{O}$  and 3-(dimethylamino)benzoic acid (0.015 g) as an orange solid (0.053 g, 0.030 mmol, 99%), mp 99.8-106.9 °C (open capillary; dec to green liquid). Anal. Calcd. for  $\text{C}_{83}\text{H}_{70}\text{BClCoF}_{24}\text{N}_7\text{O}_2 \cdot 2\text{H}_2\text{O}$  (1793.45): C 55.55, H 4.16, N, 5.46; found C 56.39, H 4.39, N 5.42. IR (powder film,  $\text{cm}^{-1}$ ): 1597, 1525, 1382, 1353, 1123, 696, 682.

NMR (acetone- $d_6$ ,  $\delta/\text{ppm}$ ):  $^1\text{H}$  (500 MHz) 3-(dimethylamino)benzoate at 7.51-7.39 (m, 3H), 6.9-6.82 (m, 1H), 2.98 (s, 6H, overlapping with  $\text{H}_2\text{O}$ );  $\text{BAr}_f^-$  at 7.83-7.78 (m, 8H,  $o$ ), 7.69 (br s, 4H,  $p$ ); dpen at 8.96 (br s, 4H,  $\text{NHH}'$ ), 7.63-7.51 (m, 12H), 7.33-7.19 (m, 18H), 5.11 (br s, 9H,  $\text{NHH}'$  and  $\text{CHNH}_2$ );  $^{13}\text{C}\{^1\text{H}\}$  (125 MHz)  $\text{BAr}_f^-$  at 162.6 (q,  $^1J_{\text{BC}} = 50.0$  Hz,  $\lambda$ ), 135.5 (br s,  $o$ ), 130.0 (qq,  $^2J_{\text{CF}} = 31.5$  Hz,  $^4J_{\text{CF}} = 2.9$  Hz,  $m$ ), 125.3 (q,  $^1J_{\text{CF}} = 271.8$  Hz,  $\text{CF}_3$ ), 118.4 (sept,  $^3J_{\text{CF}} = 4.0$  Hz,  $p$ ); dpen at 137.9 (s,  $i$ -Ph), 129.7, 129.67, 129.61, ( $3 \times$  s,  $o$ -,  $m$ -,  $p$ -Ph), 63.5 (s,  $\text{CHNH}_2$ ); 3-(dimethylamino)benzoate at 175.2 (s,  $\text{COO}^-$ ), 151.4, 139.4, 128.9, 128.2, 119.0, 115.0 ( $6 \times$  s).

**$\Lambda$ -( $S,S$ )- $2^{3+}$   $4f^- \text{Cl}^- \text{BAr}_f^- \cdot 2\text{H}_2\text{O}$ .** Isolated according to the general procedure from  $\Lambda$ -( $S,S$ )- $2^{3+}$   $2\text{Cl}^- \text{BAr}_f^- \cdot 2\text{H}_2\text{O}$  (0.100 g, 0.060 mmol), 6-chloronicotinic acid (0.028 g, 0.180 mmol), and  $\text{Na}_2\text{CO}_3$  (0.021 g, 0.198 mmol) as an orange solid (0.103 g, 0.058 mmol, 96%), mp 129.4-133.3°C (open capillary; dec to green liquid). Anal. Calcd. for  $\text{C}_{83}\text{H}_{70}\text{BClCoF}_{24}\text{N}_7\text{O}_2 \cdot \text{H}_2\text{O}$  (1769.05): C 54.32, H 3.70, N, 5.54; found C 54.32, H 3.73, N 5.52. IR (powder film,  $\text{cm}^{-1}$ ): 3040, 1609, 1585, 1537, 1393, 1354, 1275, 1119.

NMR (acetone- $d_6$ ,  $\delta/\text{ppm}$ ):  $^1\text{H}$  (500 MHz) 6-chloronicotinate at 8.99-8.94 (m, 1H), 8.37 (dd,  $^3J_{\text{HH}} = 8.1$  Hz,  $^4J_{\text{HH}} = 2.3$  Hz, 1H), 7.49 (dd,  $^3J_{\text{HH}} = 8.2$  Hz,  $^5J_{\text{HH}} = 0.7$  Hz, 1H);  $\text{BAr}_f^-$  at 7.89-7.77 (m, 8H,  $o$ ), 7.70 (s, 4H,  $p$ ); dpen at 8.55 (br s, 5H,  $\text{NHH}'$ ), 7.60-7.52 (m, 12H), 7.39-7.23 (m, 18H), 5.29 (br s, 5H,  $\text{NHH}'$ ), 5.20 (s, 6H,  $\text{CHNH}_2$ ); 3.01 (br s, 4H,  $\text{H}_2\text{O}$ );  $^{13}\text{C}\{^1\text{H}\}$  (125

MHz)  $\text{BAr}_f^-$  at 162.6 (q,  $^1J_{\text{BC}} = 50.0$  Hz, *i*), 135.5 (br s, *o*), 130.0 (qq,  $^2J_{\text{CF}} = 31.5$  Hz,  $^4J_{\text{CF}} = 2.9$  Hz, *m*), 125.4 (q,  $^1J_{\text{CF}} = 271.9$  Hz,  $\text{CF}_3$ ), 118.4 (sept,  $^3J_{\text{CF}} = 4.0$  Hz, *p*); dpen at 137.6 (s, *i*-Ph), 129.8, 129.7, 129.6 ( $3 \times$  s, *o*-, *m*-, *p*-Ph), 63.5 (s,  $\text{CHNH}_2$ ); 6-chloronicotinate at 171.9 (s,  $\text{COO}^-$ ), 153.3, 152.2, 140.8, 133.1, 124.1 ( $5 \times$  s).

**$\Lambda$ -(*S,S*)- $2^{3+}$   $4g\text{-Cl-BAr}_f^-\cdot 2\text{H}_2\text{O}$ .** Isolated according to the general procedure from  $\Lambda$ -(*S,S*)- $2^{3+}$   $2\text{Cl-BAr}_f^-\cdot 2\text{H}_2\text{O}$  and 2-methoxynicotinic acid (0.014 g) as an orange solid (0.053 g, 0.030 mmol, 99%), mp 102.7-106.7 °C (open capillary; dec to green liquid). Anal. Calcd. for  $\text{C}_{81}\text{H}_{66}\text{BClCoF}_{24}\text{N}_7\text{O}_3\cdot 2\text{H}_2\text{O}$  (1782.65): C 54.58, H 3.96, N, 5.50; found C 55.14, H 3.90, N 5.46. IR (powder film,  $\text{cm}^{-1}$ ): 3067, 1593, 1580, 1499, 1354, 1275, 1119.

NMR (acetone- $d_6$ ,  $\delta/\text{ppm}$ ):<sup>s5</sup>  $^1\text{H}$  (500 MHz) 2-methoxynicotinate at 8.22-8.13 (m, 1H), 8.07-7.97 (m, 1H), 7.01-6.90 (m, 1H), 3.96 (s, 3H);  $\text{BAr}_f^-$  at 7.85-7.79 (m, 8H, *o*), 7.70 (s, 4H, *p*); dpen at 8.69 (br s, 4H,  $\text{NHH}'$ ), 7.64-7.46 (m, 12H), 7.36-7.17 (m, 18H), 5.21 (br s, 4H,  $\text{NHH}'$ ), 5.14 (s, 6H,  $\text{CHNH}_2$ );  $^{13}\text{C}\{^1\text{H}\}$  (125 MHz)  $\text{BAr}_f^-$  at 162.6 (q,  $^1J_{\text{BC}} = 49.8$  Hz, *i*), 135.5 (br s, *o*), 130.0 (qq,  $^2J_{\text{CF}} = 31.0$  Hz,  $^4J_{\text{CF}} = 2.8$  Hz, *m*), 125.4 (q,  $^1J_{\text{CF}} = 271.8$  Hz,  $\text{CF}_3$ ), 118.4 (sept,  $^3J_{\text{CF}} = 3.9$  Hz, *p*); dpen at 137.7 (s, *i*-Ph), 129.7 (double intensity), 129.6 ( $2 \times$  s, *o*-, *m*-, *p*-Ph), 63.5 (s,  $\text{CHNH}_2$ ); 2-methoxynicotinate at 173.8 (s,  $\text{COO}^-$ ), 162.5, 147.8, 139.9, 123.9, 117.0 ( $5 \times$  s), 53.5 (s,  $\text{OCH}_3$ ).

**$\Lambda$ -(*S,S*)- $2^{3+}$   $4h\text{-Cl-BAr}_f^-\cdot \text{H}_2\text{O}$ .** Isolated according to the general procedure from  $\Lambda$ -(*S,S*)- $2^{3+}$   $2\text{Cl-BAr}_f^-\cdot 2\text{H}_2\text{O}$  (0.100 g, 0.060 mmol), 6-methylnicotinic acid (0.025 g, 0.180 mmol), and  $\text{Na}_2\text{CO}_3$  (0.021 g, 0.20 mmol) as an orange solid (0.096 g, 0.055 mmol, 91%), mp 121.6-134.1 °C (open capillary; dec to green liquid). Anal. Calcd. for  $\text{C}_{83}\text{H}_{70}\text{BClCoF}_{24}\text{N}_7\text{O}_2\cdot \text{H}_2\text{O}$  (1748.64): C 55.64, H 3.92, N, 5.61; found C 55.56, H 3.96, N 5.61. IR (powder film,  $\text{cm}^{-1}$ ): 3034, 1607, 1533, 1389, 1354, 1275, 1119.

NMR (acetone- $d_6$ ,  $\delta/\text{ppm}$ ):<sup>s5</sup>  $^1\text{H}$  (500 MHz) 2-methylnicotinate at 9.08 (apparent s, 1H), 8.21 (dd,  $^3J_{\text{HH}} = 7.9$  Hz,  $^4J_{\text{HH}} = 2.1$  Hz, 1H), 7.24 (m, 1H, overlapping with dpen), 2.54 (s, 3H);  $\text{BAr}_f^-$  at 7.85-7.77 (m, 8H, *o*), 7.69 (s, 4H, *p*); dpen at 8.72 (br s, 4H,  $\text{NHH}'$ ), 7.62-7.46 (m, 12H), 7.36-7.19 (m, 18H), 5.16 (m, 10H,  $\text{CHNH}_2$ ,  $\text{NHH}'$ );  $^{13}\text{C}\{^1\text{H}\}$  (125 MHz)  $\text{BAr}_f^-$  at 162.6

(q,  $^1J_{BC} = 50.5$  Hz, *i*), 135.5 (br s, *o*), 130.0 (qq,  $^2J_{CF} = 31.5$  Hz,  $^4J_{CF} = 2.8$  Hz, *m*), 125.3 (q,  $^1J_{CF} = 271.8$  Hz,  $CF_3$ ), 118.4 (sept,  $^3J_{CF} = 4.0$  Hz, *p*); dpen at 137.7 (s, *i*-Ph), 130.9 (s, *o*-, *m*-, *p*-Ph), 63.5 (s,  $CHNH_2$ ); 2-methylnicotinate at 173.4 (s,  $COO^-$ ), 160.7, 151.6, 137.8, 130.9, 122.8 (5 × s), 24.5 (s,  $CH_3$ ).

**$\Lambda$ -(*S,S*)- $2^{3+}$  4*i*-Cl $^-$ BAr $_f^-$ ·2H $_2$ O.** Isolated according to the general procedure from  $\Lambda$ -(*S,S*)- $2^{3+}$  2Cl $^-$ BAr $_f^-$ ·2H $_2$ O (0.100 g, 0.060 mmol), 6-aminonicotinic acid (0.025 g, 0.180 mmol), and Na $_2$ CO $_3$  (0.021 g, 0.20 mmol) as an orange solid (0.095 g, 0.054 mmol, 90%), mp 118.4 °C (open capillary; dec to green liquid with gradual darkening at lower temperatures). Anal. Calcd. for C $_8$ H $_7$ BClCoF $_{24}$ N $_7$ O $_2$ ·2H $_2$ O (1767.64): C 54.36 H 3.93, N, 6.34; found C 54.34, H 3.87, N 6.11. IR (powder film, cm $^{-1}$ ): 3069, 1609, 1375, 1354, 1275, 1119.

NMR (acetone- $d_6$ ,  $\delta$ /ppm):  $^1H$  (500 MHz) 6-aminonicotinate at 8.67 (d,  $^4J_{HH} = 1.7$  Hz, 1H), 8.00 (dd,  $^3J_{HH} = 8.5$  Hz,  $^4J_{HH} = 2.2$  Hz, 1H), 6.51, (dd,  $^3J_{HH} = 8.5$  Hz,  $^5J_{HH} = 0.8$  Hz, 1H), 5.70 (br s, 2H,  $NH_2$ ); BAr $_f^-$  at 7.86-7.74 (m, 8H, *o*), 7.68 (s, 4H, *p*); dpen at 8.89 (br s, 2H,  $NHH'$ ), 7.60-7.41 (m, 12H), 7.34-7.13 (m, 18H), 5.08 (br s, 8H,  $CHNH_2$ ,  $NHH'$ );  $^{13}C\{^1H\}$  (125 MHz) BAr $_f^-$  at 162.6 (q,  $^1J_{BC} = 49.7$  Hz, *i*), 135.5 (br s, *o*), 130.0 (qq,  $^2J_{CF} = 31.5$  Hz,  $^4J_{CF} = 2.8$  Hz, *m*), 125.3 (q,  $^1J_{CF} = 271.6$  Hz,  $CF_3$ ), 118.4 (sept,  $^3J_{CF} = 4.0$  Hz, *p*); dpen at 137.7 (s, *i*-Ph), 129.7 (double intensity), 129.6 (2 × s, *o*-, *m*-, *p*-Ph), 63.3 (s,  $CHNH_2$ ); 6-aminonicotinate at 174.2 (s,  $COO^-$ ), 161.8, 151.8, 139.4, 123.2, 107.1 (5 × s);  $^{19}F\{^1H\}$  (470 MHz, CDCl $_3$  vs. internal C $_6$ H $_5$ CF $_3$  at -63.72) -63.2 (s).

**$\Delta$ -(*S,S*)- $2^{3+}$  4*i*-Cl $^-$ BAr $_f^-$ ·2H $_2$ O.** Isolated according to the general procedure from  $\Delta$ -(*S,S*)- $2^{3+}$  2Cl $^-$ BAr $_f^-$ ·H $_2$ O (0.200 g, 0.120 mmol), 6-aminonicotinic acid (0.050 g, 0.360 mmol), and Na $_2$ CO $_3$  (0.042 g, 0.396 mmol) as an orange solid (0.202 g, 0.11 mmol, 95%), mp 110.5 °C (open capillary; dec to green liquid with gradual darkening at lower temperatures). Anal. Calcd. for C $_8$ H $_7$ BClCoF $_{24}$ N $_7$ O $_2$ ·2H $_2$ O (1767.64): C 54.36, H 3.93, N, 6.34; found C 54.02, H 3.97, N 6.37. IR (powder film, cm $^{-1}$ ): 3042, 1609, 1456, 1354, 1275, 1119.

NMR (acetone- $d_6$ ,  $\delta$ /ppm):  $^1H$  (500 MHz) 6-aminonicotinate at 8.79 (apparent s, 1H), 7.94 (dd,  $^3J_{HH} = 8.4$  Hz,  $^4J_{HH} = 2.2$  Hz, 1H), 6.48, (d,  $^3J_{HH} = 8.4$  Hz, 1H), 5.85 (br s, 2H,  $NH_2$ );



BAr<sub>f</sub><sup>-</sup> at 7.84-7.79 (m, 8H, *o*), 7.69 (s, 4H, *p*); dpen at 7.75 (br s, 2H, NHH'), 7.57-7.42 (m, 12H), 7.32-7.09 (m, 18H), 6.18 (br s, 4H, NHH') 5.07 (br s, 6H, CHNH<sub>2</sub>); <sup>13</sup>C{<sup>1</sup>H} (125 MHz) BAr<sub>f</sub><sup>-</sup> at 162.6 (q, <sup>1</sup>J<sub>BC</sub> = 50.0 Hz, *i*), 135.5 (br s, *o*), 130.0 (qq, <sup>2</sup>J<sub>CF</sub> = 31.5 Hz, <sup>4</sup>J<sub>CF</sub> = 2.8 Hz, *m*), 125.4 (q, <sup>1</sup>J<sub>CF</sub> = 271.8 Hz, CF<sub>3</sub>), 118.4 (sept, <sup>3</sup>J<sub>CF</sub> = 4.0 Hz, *p*); dpen at 137.8 (s, *i*-Ph), 129.5, 129.4, 129.2 (3 × s, *o*-, *m*-, *p*-Ph), 66.1 (s, CHNH<sub>2</sub>); 6-aminonicotinate at 173.5 (s, COO<sup>-</sup>), 161.7, 151.8, 139.4, 123.6, 107.2 (5 × s).

#### Nitroolefin addition products accessed by the general procedure for Chart 4

**Dimethyl 2-(2-nitro-1-phenylethyl)malonate (7a).** This known compound was obtained as a colorless oil, 95%. NMR (CDCl<sub>3</sub>, δ/ppm): <sup>1</sup>H (400 MHz) 7.35-7.26 (m, 3H), 7.23-7.18 (m, 2H), 4.97-4.80 (m, 2H), 4.23 (td, <sup>3</sup>J<sub>HH</sub> = 8.9, 5.3 Hz, 1H), 3.85 (d, <sup>3</sup>J<sub>HH</sub> = 9.0 Hz, 1H), 3.75 (s, 3H), 3.55 (s, 3H). <sup>13</sup>C{<sup>1</sup>H} (100 MHz) 168.0, 167.4, 136.3, 129.2, 128.6, 128.0, 77.5, 54.9, 53.2, 53.0, 43.0 (11 × s). The enantiomeric excess was determined by HPLC with a Chiralcel AD column (98:2 v/v hexane/isopropanol, 1 mL/min, λ = 220 nm); t<sub>R</sub> = 32.9 min (major), 43.6 min (minor), 86% ee.<sup>s1</sup>

**Diethyl 2-(2-nitro-1-phenylethyl)malonate (7a-Et).** This known compound was obtained as a colorless oil, 90%. NMR (CDCl<sub>3</sub>, δ/ppm): <sup>1</sup>H (500 MHz) 7.34-7.26 (m, 3H), 7.25-7.21 (m, 2H), 5.05-4.74 (m, 2H), 4.34-4.12 (m, 3H), 4.00 (q, <sup>3</sup>J<sub>HH</sub> = 7.1 Hz, 2H), 3.82 (d, <sup>3</sup>J<sub>HH</sub> = 9.4 Hz, 1H), 1.26 (t, <sup>3</sup>J<sub>HH</sub> = 7.1 Hz, 3H), 1.04 (t, <sup>3</sup>J<sub>HH</sub> = 7.1 Hz, 3H). The enantiomeric excess was determined by HPLC with a Chiralcel AD column (90:10 v/v hexane/isopropanol, 1 mL/min, λ = 230 nm); t<sub>R</sub> = 11.4 min (major), 24.4 min (minor), 80% ee.<sup>s7</sup>

**Diisopropyl 2-(2-nitro-1-phenylethyl)malonate (7a-*i*Pr).** This known compound was obtained as a colorless oil, 29%. NMR (CDCl<sub>3</sub>, δ/ppm): <sup>1</sup>H (500 MHz). 7.34-7.27 (m, 3H), 7.26-7.21 (m, 2H), 5.08 (sept, <sup>3</sup>J<sub>HH</sub> = 6.3 Hz, 1H), 4.92 (dd, <sup>2</sup>J<sub>HH</sub> = 12.9 Hz, <sup>3</sup>J<sub>HH</sub> = 4.6 Hz, 1H), 4.87-4.79 (m, 2H), 4.20 (td, <sup>3</sup>J<sub>HH</sub> = 9.5, 4.6 Hz, 1H), 3.76 (d, <sup>3</sup>J<sub>HH</sub> = 9.6 Hz, 1H), 1.244 (d, <sup>3</sup>J<sub>HH</sub> = 6.3 Hz, 3H), 1.242 (d, <sup>3</sup>J<sub>HH</sub> = 6.3 Hz, 3H), 1.06 (d, <sup>3</sup>J<sub>HH</sub> = 6.3 Hz, 3H), 1.01 (d, <sup>3</sup>J<sub>HH</sub> = 6.3 Hz, 3H). The enantiomeric excess was determined by HPLC with a Chiralcel OD column (95:5

v/v hexane/isopropanol, 1 mL/min,  $\lambda$  = 220 nm);  $t_R$  = 10.5 min (major), 12.4 min (minor), 65% ee.<sup>S1</sup>

**Dimethyl 2-(2-nitro-1- $\beta$ -naphthylethyl)malonate (7b).** This known compound was obtained as a colorless oil, 90%. NMR (CDCl<sub>3</sub>,  $\delta$ /ppm): <sup>1</sup>H (500 MHz) 8.18 (d, <sup>3</sup> $J_{HH}$  = 8.6 Hz, 1H), 7.87 (d, <sup>3</sup> $J_{HH}$  = 8.2 Hz, 1H), 7.80 (d, <sup>3</sup> $J_{HH}$  = 8.0 Hz, 1H), 7.62 (ddd, <sup>3</sup> $J_{HH}$  = 8.4, 6.8 Hz, <sup>4</sup> $J_{HH}$  = 1.4 Hz, 1H), 7.53 (ddd, <sup>3</sup> $J_{HH}$  = 8.0, 6.8 Hz, <sup>4</sup> $J_{HH}$  = 1.1 Hz, 1H), 7.46-7.40 (m, 1H), 7.38 (d, <sup>3</sup> $J_{HH}$  = 7.3 Hz, 1H), 5.27-5.20 (m, 1H), 5.18 (dd, <sup>2</sup> $J_{HH}$  = 13.1 Hz, <sup>3</sup> $J_{HH}$  = 8.2 Hz, 1H), 5.07 (dd, <sup>2</sup> $J_{HH}$  = 13.1 Hz, <sup>3</sup> $J_{HH}$  = 4.5 Hz, 1H), 4.11 (d, <sup>3</sup> $J_{HH}$  = 7.6 Hz, 1H), 3.72 (s, 3H), 3.54 (s, 3H). The enantiomeric excess was determined by HPLC with a Chiralcel OD column (70:30 v/v hexane/isopropanol, 1 mL/min,  $\lambda$  = 254 nm);  $t_R$  = 12.5 min (major), 35.5 min (minor), 84% ee.<sup>S1</sup>

**Dimethyl 2-(2-nitro-1- $\alpha$ -naphthylethyl)malonate (7c).** This known compound was obtained as a colorless oil, 95%. NMR (CDCl<sub>3</sub>,  $\delta$ /ppm): <sup>1</sup>H (500 MHz) 8.18 (d, <sup>3</sup> $J_{HH}$  = 8.5 Hz, 1H), 7.87 (d, <sup>3</sup> $J_{HH}$  = 8.1 Hz, 1H), 7.80 (d, <sup>3</sup> $J_{HH}$  = 7.9 Hz, 1H), 7.62 (ddd, <sup>3</sup> $J_{HH}$  = 8.4, 6.9 Hz, <sup>4</sup> $J_{HH}$  = 1.3 Hz, 1H), 7.58-7.48 (m, 1H), 7.47-7.35 (m, 2H), 5.27-5.24 (m, 1H), 5.18 (dd, <sup>2</sup> $J_{HH}$  = 13.1 Hz, <sup>3</sup> $J_{HH}$  = 8.2 Hz, 1H), 5.07 (dd, <sup>2</sup> $J_{HH}$  = 13.1 Hz, <sup>3</sup> $J_{HH}$  = 4.5 Hz, 1H), 4.11 (d, <sup>3</sup> $J_{HH}$  = 7.6 Hz, 1H), 3.72 (s, 3H), 3.54 (s, 3H). The enantiomeric excess was determined by HPLC with a Chiralcel AD column (90:10 v/v hexane/isopropanol, 1 mL/min,  $\lambda$  = 254 nm);  $t_R$  = 14.4 min (major), 19.1 min (minor), 90% ee.<sup>S1</sup>

**Dimethyl 2-(2-nitro-1-(4-methoxyphenyl)ethyl)malonate (7d).** This known compound was obtained as a colorless oil, 99%. NMR (CDCl<sub>3</sub>,  $\delta$ /ppm): <sup>1</sup>H (500 MHz) 7.17-7.10 (m, 2H), 6.88-6.79 (m, 2H), 4.89 (dd, <sup>2</sup> $J_{HH}$  = 13.0 Hz, <sup>3</sup> $J_{HH}$  = 5.0 Hz, 1H), 4.82 (dd, <sup>2</sup> $J_{HH}$  = 13.0 Hz, <sup>3</sup> $J_{HH}$  = 9.2 Hz, 1H), 4.19 (td, <sup>3</sup> $J_{HH}$  = 9.2, 5.0 Hz, 1H), 3.82 (d, <sup>3</sup> $J_{HH}$  = 9.2 Hz, 1H), 3.77 (s, 3H), 3.76 (s, 3H), 3.57 (s, 3H). The enantiomeric excess was determined by HPLC with a Chiralcel AD column (80:20 v/v hexane/isopropanol, 1 mL/min,  $\lambda$  = 254 nm);  $t_R$  = 12.4 min (major), 18.0 min (minor), 71% ee.<sup>S1</sup>

**Dimethyl 2-(2-nitro-1-(4-nitrophenyl)phenylethyl)malonate (7e).** This known compound was obtained as a colorless oil, 85%. NMR (CDCl<sub>3</sub>,  $\delta$ /ppm): <sup>1</sup>H (500 MHz) 8.24-8.17 (m, 2H),

7.61-7.36 (m, 2H), 5.07-4.82 (m, 2H), 4.37 (td,  $^3J_{\text{HH}} = 8.9, 5.2$  Hz, 1H), 3.88 (d,  $^3J_{\text{HH}} = 8.8$  Hz, 1H), 3.78 (s, 3H), 3.61 (s, 3H). The enantiomeric excess was determined by HPLC with a Chiralcel OD-H column (90:10 v/v hexane/isopropanol, 1 mL/min,  $\lambda = 220$  nm);  $t_{\text{R}} = 22.7$  min (minor), 35.1 min (major), 76% ee.

**Dimethyl 2-(2-nitro-1-(3,4-dioxolophenyl)ethyl)malonate (7f).** This known compound was obtained as a colorless oil, 90%. NMR ( $\text{CDCl}_3$ ,  $\delta/\text{ppm}$ ):  $^1\text{H}$  (500 MHz) 6.85-6.59 (m, 3H), 5.95 (s, 2H), 5.01-4.58 (m, 2H), 4.15 (td,  $^3J_{\text{HH}} = 9.3, 4.9$  Hz, 1H), 3.80 (d,  $^3J_{\text{HH}} = 9.1$  Hz, 1H), 3.76 (s, 3H), 3.61 (s, 3H). The enantiomeric excess was determined by HPLC with a Chiralcel AS-H column (90:10 v/v hexane/isopropanol, 1 mL/min,  $\lambda = 220$  nm);  $t_{\text{R}} = 44.8$  min (major), 53.3 min (minor), 97% ee.<sup>s8</sup>

**Dimethyl 2-(2-nitro-1-(4-methoxycarbonyl)phenylethyl)malonate (7g).** This known compound was obtained as a colorless oil, 73%. NMR ( $\text{CDCl}_3$ ,  $\delta/\text{ppm}$ ):  $^1\text{H}$  (500 MHz) 8.00 (d,  $^3J_{\text{HH}} = 8.4$  Hz, 2H), 7.32 (d,  $^3J_{\text{HH}} = 8.3$  Hz, 2H), 5.25-4.71 (m, 2H), 4.31 (td,  $^3J_{\text{HH}} = 8.8, 5.3$  Hz, 1H), 3.90 (s, 3H), 3.87 (d,  $^3J_{\text{HH}} = 8.9$  Hz, 1H), 3.77 (s, 3H), 3.57 (s, 3H). The enantiomeric excess was determined by HPLC with a Chiralcel AD-H column (90:10 v/v hexane/isopropanol, 1 mL/min,  $\lambda = 210$  nm);  $t_{\text{R}} = 28.5$  min (major), 42.8 min (minor), 67% ee.<sup>s9</sup>

**Dimethyl 2-(2-nitro-1-(2-(trifluoromethyl)phenylethyl)malonate (7h).** This known compound was obtained as a colorless oil, 99%. NMR ( $\text{CDCl}_3$ ,  $\delta/\text{ppm}$ ):  $^1\text{H}$  (500 MHz). 7.72 (d,  $^3J_{\text{HH}} = 7.8$  Hz, 1H), 7.53 (t,  $^3J_{\text{HH}} = 8.1$  Hz, 1H), 7.43 (ddt,  $^3J_{\text{HH}} = 7.7, 6.7$  Hz,  $^4J_{\text{HH}} = 1.0$  Hz, 1H), 7.37 (d,  $^3J_{\text{HH}} = 7.9$  Hz, 1H), 5.16 (dd,  $^2J_{\text{HH}} = 13.3$  Hz,  $^3J_{\text{HH}} = 7.7$  Hz, 1H), 4.94 (dd,  $^2J_{\text{HH}} = 13.4$  Hz,  $^3J_{\text{HH}} = 4.5$  Hz, 1H), 4.64 (td,  $^3J_{\text{HH}} = 7.6, 4.5$  Hz, 1H), 4.10 (d,  $^3J_{\text{HH}} = 7.4$  Hz, 1H), 3.75 (s, 3H), 3.64 (s, 3H). The enantiomeric excess was determined by HPLC with a Chiralcel OD column (95:5 v/v hexane/isopropanol, 1 mL/min,  $\lambda = 220$  nm);  $t_{\text{R}} = 12.0$  min (minor), 22.6 min (major), 91% ee.<sup>s1</sup>

**Dimethyl 2-(2-nitro-1-(2-acetoxyphenyl)ethyl)malonate (7i).** This known compound was obtained as a colorless oil, 82%. NMR ( $\text{CDCl}_3$ ,  $\delta/\text{ppm}$ ):  $^1\text{H}$  (500 MHz) 7.32 (ddd,  $^3J_{\text{HH}} = 8.1, 7.2$  Hz,  $^4J_{\text{HH}} = 1.8$  Hz, 1H), 7.26 (dd,  $^3J_{\text{HH}} = 7.9$  Hz,  $^4J_{\text{HH}} = 1.8$  Hz, 1H), 7.23-7.18 (m, 1H),

7.14 (dd,  $^3J_{\text{HH}} = 8.1$  Hz,  $^4J_{\text{HH}} = 1.2$  Hz, 1H), 5.00-4.82 (m, 2H), 4.49 (td,  $^3J_{\text{HH}} = 8.1$ , 5.3 Hz, 1H), 3.92 (d,  $^3J_{\text{HH}} = 8.5$  Hz, 1H), 3.74 (s, 3H), 3.59 (s, 3H), 2.39 (s, 3H). The enantiomeric excess was determined by HPLC with a Chiralcel OD column (90:10 v/v hexane/isopropanol, 1 mL/min,  $\lambda = 210$  nm);  $t_{\text{R}} = 17.3$  min (minor), 24.5 min (major), 91% ee.<sup>s1</sup>

**Dimethyl 2-(2-nitro-1-(2-benzoyloxyphenyl)ethyl)malonate (7j).** This known compound was obtained as a colorless oil, 99%. NMR ( $\text{CDCl}_3$ ,  $\delta$ /ppm):  $^1\text{H}$  (500 MHz) 8.36-8.22 (m, 2H), 7.75-7.63 (m, 1H), 7.60-7.53 (m, 2H), 7.42-7.31 (m, 2H), 7.29-7.21 (m, 2H), 4.98 (dd,  $^2J_{\text{HH}} = 13.6$  Hz,  $^3J_{\text{HH}} = 8.6$  Hz, 1H), 4.91 (dd,  $^2J_{\text{HH}} = 13.6$  Hz,  $^3J_{\text{HH}} = 4.9$  Hz, 1H), 4.59 (td,  $^3J_{\text{HH}} = 8.5$ , 4.9 Hz, 1H), 3.96 (d,  $^3J_{\text{HH}} = 8.5$  Hz, 1H), 3.72 (s, 3H), 3.52 (s, 3H). The enantiomeric excess was determined by HPLC with a Chiralcel AD column (90:10 v/v hexane/isopropanol, 1 mL/min,  $\lambda = 220$  nm);  $t_{\text{R}} = 16.1$  min (major), 25.7 min (minor), 91% ee.<sup>s1</sup>

**Dimethyl 2-(2-nitro-1-(2-benzoyloxyphenyl)ethyl)malonate (7k).** This known compound was obtained as a colorless oil, 95%. NMR ( $\text{CDCl}_3$ ,  $\delta$ /ppm):  $^1\text{H}$  (500 MHz) 7.53-7.46 (m, 2H), 7.45-7.40 (m, 2H), 7.39-7.34 (m, 1H), 7.24 (ddd,  $^3J_{\text{HH}} = 8.3$ , 7.4 Hz,  $^4J_{\text{HH}} = 1.7$  Hz, 1H), 7.17 (dd,  $^3J_{\text{HH}} = 7.6$  Hz,  $^4J_{\text{HH}} = 1.7$  Hz, 1H), 6.93 (dd,  $^3J_{\text{HH}} = 8.3$  Hz,  $^4J_{\text{HH}} = 1.0$  Hz, 1H), 6.90 (td,  $^3J_{\text{HH}} = 7.5$  Hz,  $^4J_{\text{HH}} = 1.1$  Hz, 1H), 5.14 (d,  $^2J_{\text{HH}} = 11.8$  Hz, 1H), 5.11 (d,  $^2J_{\text{HH}} = 11.8$  Hz, 1H), 5.05 (dd,  $^2J_{\text{HH}} = 13.0$  Hz,  $^3J_{\text{HH}} = 9.4$  Hz, 1H), 4.84 (dd,  $^2J_{\text{HH}} = 13.0$  Hz,  $^3J_{\text{HH}} = 4.6$  Hz, 1H), 4.44 (td,  $^3J_{\text{HH}} = 9.6$ , 4.5 Hz, 1H), 4.17 (d,  $^3J_{\text{HH}} = 9.9$  Hz, 1H), 3.72 (s, 3H), 3.50 (s, 3H). The enantiomeric excess was determined by HPLC with a Chiralcel OD column (90:10 v/v hexane/isopropanol, 1 mL/min,  $\lambda = 220$  nm);  $t_{\text{R}} = 10.8$  min (minor), 17.9 min (major), 91% ee.<sup>s1</sup>

**Dimethyl 2-(2-nitro-1-(2-bromophenyl)ethyl)malonate (7l).** This known compound was obtained as a colorless oil, 99%. NMR ( $\text{CDCl}_3$ ,  $\delta$ /ppm):  $^1\text{H}$  (500 MHz) 7.61 (dd,  $^3J_{\text{HH}} = 8.0$  Hz,  $^4J_{\text{HH}} = 1.0$  Hz, 1H), 7.33-7.20 (m, 2H), 7.16 (td,  $^3J_{\text{HH}} = 8.0$  Hz,  $^4J_{\text{HH}} = 1.8$  Hz, 1H), 5.13 (dd,  $^2J_{\text{HH}} = 13.7$  Hz,  $^3J_{\text{HH}} = 8.5$  Hz, 1H), 4.96 (dd,  $^2J_{\text{HH}} = 13.7$  Hz,  $^3J_{\text{HH}} = 4.5$  Hz, 1H), 4.77 (td,  $^3J_{\text{HH}} = 8.2$ , 4.5 Hz, 1H), 4.11 (d,  $^3J_{\text{HH}} = 8.0$  Hz, 1H), 3.73 (s, 3H), 3.66 (s, 3H). The enantiomeric excess was determined by HPLC with a Chiralcel OD-H column (70:30 v/v hexane/isopropanol, 1 mL/min,  $\lambda = 220$  nm);  $t_{\text{R}} = 8.3$  min (minor), 14.1 min (minor), 87% ee.<sup>s10</sup>

**Dimethyl 2-(2-nitro-1-(2-methylphenyl)ethyl)malonate (7m).** This known compound was obtained as a colorless oil, 74%. NMR (CDCl<sub>3</sub>,  $\delta$ /ppm): <sup>1</sup>H (500 MHz) 7.20-7.08 (m, 4H), 4.90 (dd, <sup>2</sup>J<sub>HH</sub> = 13.2 Hz, <sup>3</sup>J<sub>HH</sub> = 5.2 Hz, 1H), 4.85 (dd, <sup>2</sup>J<sub>HH</sub> = 13.2 Hz, <sup>3</sup>J<sub>HH</sub> = 8.8 Hz, 1H), 4.57 (td, <sup>3</sup>J<sub>HH</sub> = 9.0, 5.2 Hz, 1H), 3.83 (d, <sup>3</sup>J<sub>HH</sub> = 9.2 Hz, 1H), 3.76 (s, 3H), 3.54 (s, 3H), 2.44 (s, 3H). The enantiomeric excess was determined by HPLC with a Chiralcel AD-H column (75:25 v/v hexane/isopropanol, 1 mL/min,  $\lambda$  = 210 nm); t<sub>R</sub> = 9.8 min (major), 19.1 min (minor), 82% ee.<sup>s11</sup>

**Dimethyl 2-(2-nitro-1-furylethyl)malonate (7n).** This known compound was obtained as a colorless oil, 87%. NMR (CDCl<sub>3</sub>,  $\delta$ /ppm): <sup>1</sup>H (500 MHz) 7.34 (dd, <sup>3</sup>J<sub>HH</sub> = 1.9 Hz, <sup>4</sup>J<sub>HH</sub> = 0.8 Hz, 1H), 6.29 (dd, <sup>3</sup>J<sub>HH</sub> = 3.3, 1.9 Hz, 1H), 6.22 (dt, <sup>3</sup>J<sub>HH</sub> = 3.3 Hz, <sup>4</sup>J<sub>HH</sub> = 0.7 Hz, 1H), 4.98-4.84 (m, 2H), 4.38 (td, <sup>3</sup>J<sub>HH</sub> = 8.2, 5.2 Hz, 1H), 3.94 (d, <sup>3</sup>J<sub>HH</sub> = 7.8 Hz, 1H), 3.76 (s, 3H), 3.69 (s, 3H). The enantiomeric excess was determined by HPLC with a Chiralcel OD column (90:10 v/v hexane/isopropanol, 1 mL/min,  $\lambda$  = 220 nm); t<sub>R</sub> = 10.7 min (minor), 21.4 min (major), 84% ee.<sup>s1</sup>

**(*E*)-Dimethyl 2-(1-nitro-4-phenylbut-3-en-2-yl)malonate (7o).** This known compound was obtained as a colorless oil, 14%. The <sup>1</sup>H NMR spectrum matches those reported earlier.<sup>s9</sup> NMR (CDCl<sub>3</sub>,  $\delta$ /ppm): <sup>1</sup>H (500 MHz) 7.35-7.28 (m, 5H), 6.58 (d, <sup>3</sup>J<sub>HH</sub> = 15.7 Hz, 1H), 6.10 (dd, <sup>3</sup>J<sub>HH</sub> = 15.8, 9.0 Hz, 1H), 4.83-4.62 (m, 2H), 3.77 (s, 3H), 3.73 (s, 3H), 3.73-3.71 (m, 2H). The enantiomeric excess was determined by HPLC with a Chiralcel IC column (99:1 v/v hexane/isopropanol, 1 mL/min,  $\lambda$  = 210 nm); t<sub>R</sub> = 46.2 min (minor), 55.4 min (major), 73% ee.<sup>s9</sup>

#### Di-*t*-butyl azodicarboxylate addition products accessed by the general procedure for Chart 5

***N,N*-Bis(*t*-butoxycarbonyl)-1-hydrazino-2-oxocyclopentanecarboxylic acid methyl ester (10a).** This known compound was obtained as a colorless oil, 99%. NMR (CDCl<sub>3</sub>,  $\delta$ /ppm): <sup>1</sup>H (500 MHz) 6.70-6.03 (m, 1H), 3.76 (s, 3H), 2.97-2.03 (m, 5 H), 2.03-1.81 (s, 1H), 1.53-1.29 (m, 18H). The enantiomeric excess was determined by HPLC with a Chiralcel AD column (96:4 v/v hexane/isopropanol, 1 mL/min,  $\lambda$  = 210 nm); t<sub>R</sub> = 13.6 min (major), 20.0 min (minor), 82% ee.<sup>s12</sup>

***N,N*-Bis(*t*-butoxycarbonyl)-1-hydrazino-2-oxocyclopentanecarboxylic acid ethyl ester (10b).** This known compound was obtained as a colorless oil, 91%. NMR (CDCl<sub>3</sub>, δ/ppm): <sup>1</sup>H (500 MHz) 6.69-6.02 (m, 1H), 4.34-4.11 (m, 2H), 2.92-2.04 (m, 5H), 2.05-1.82 (m, 1H), 1.54-1.35 (m, 18H), 1.34-1.22 (m, 3H). The enantiomeric excess was determined by HPLC with a Chiralcel AD column (96:4 v/v hexane/isopropanol, 1 mL/min, λ = 210 nm); t<sub>R</sub> = 10.6 min (major), 15.8 min (minor), 81% ee.<sup>s12</sup>

***N,N*-Bis(*t*-butoxycarbonyl)-1-acetyl-1-hydrazino-2-oxocyclopentane (10c).** This known compound was obtained as a colorless oil, 99%. NMR (CDCl<sub>3</sub>, δ/ppm): <sup>1</sup>H (500 MHz) 6.55-5.99 (m, 1H), 2.93-1.58 (m, 9H), 1.52-1.36 (m, 18H). The enantiomeric excess was determined by HPLC with a Chiralcel AS-H column (90:10 v/v hexane/isopropanol, 1 mL/min, λ = 210 nm); t<sub>R</sub> = 5.8 min (major), 11.0 min (minor), 81% ee.<sup>s13</sup>

***N,N*-Bis(*t*-butoxycarbonyl)-2-hydrazino-2-methyl-3-oxobutyric acid ethyl ester (10d).** This known compound was obtained as a colorless oil, 95%. NMR (CDCl<sub>3</sub>, δ/ppm): <sup>1</sup>H (500 MHz) 6.44-5.84 (m, 1H), 4.35-4.08 (m, 2H), 3.76 (s, 3H), 2.47-2.17 (m, 3H), 1.65-1.56 (m, 3H), 1.55-1.36 (m, 18H), 1.29 (t, <sup>3</sup>J<sub>HH</sub> = 7.2 Hz, 3H). The enantiomeric excess was determined by HPLC with a Chiralcel AD-H column (95:5 v/v hexane/isopropanol, 1 mL/min, λ = 210 nm); t<sub>R</sub> = 14.0 min (minor), 19.4 min (major), 79% ee.<sup>s12</sup>

***N,N*-Bis(*t*-butoxycarbonyl)-1-acetyl-1-hydrazino-2-oxocyclohexane (10e).** This known compound was obtained as a colorless oil, 92%. NMR (CDCl<sub>3</sub>, δ/ppm): <sup>1</sup>H (500 MHz) 6.30-5.66 (m, 1H), 3.19-1.7 (m, 2H), 1.53-1.31 (m, 18H). The enantiomeric excess was determined by HPLC with a Chiralcel AD-H column (95:5 v/v hexane/isopropanol, 1 mL/min, λ = 210 nm); t<sub>R</sub> = 15.6 min (minor), 41.6 min (major), 86% ee.<sup>s12</sup>

***N,N'*-Bis(*t*-butoxycarbonyl)-1-hydrazino-1,2,3,4-tetrahydro-1-oxonaphthalene-2-carboxylic acid ethyl ester (10f).** This known compound was obtained as a colorless oil, 90%. NMR (CDCl<sub>3</sub>, δ/ppm): <sup>1</sup>H (500 MHz) 7.95-7.84 (m, 1H), 7.54-7.38 (m, 1H), 7.37-7.17 (m, 2H), 6.38-6.01 (m, 1H), 4.38-4.17 (m, 2H), 3.63-2.54 (m, 4H), 1.54-1.09 (m, 21H). The enantiomeric excess was determined by HPLC with a Chiralcel AD-H column (80:20 v/v hexane/isopropanol,

1 mL/min,  $\lambda$  = 220 nm);  $t_R$  = 9.3 min (minor), 11.6 min (major), 51% ee.<sup>s12</sup>

## References

(s1) Lewis, K.G.; Ghosh, S.K.; Bhuvanesh, N.; Gladysz, J.A. Cobalt(III) Werner Complexes with 1,2-Diphenylethylenediamine Ligands: Readily Available, Inexpensive, and Modular Chiral Hydrogen Bond Donor Catalysts for Enantioselective Organic Synthesis. *ACS Cent Sci* **2015**, *1*, 50-56.

(s2) Sedef Özdemir, H.; Şahin, E.; Çakıcı, M.; Kılıç, H. Asymmetric Friedel–Crafts alkylation of pyrrole with nitroalkenes catalyzed by a copper complex of a bisphenol A-derived Schiff base. *Tetrahedron* **2015**, *71*, 2882-2890.

(s3) This synthesis was adapted from a literature procedure: Mohr, L.-M.; Bauer, A.; Jandl, C.; Bach, T. Visible light-mediated intermolecular [2+2] photocycloaddition of 1-aryl-2-nitroethenes and olefins. *Org. Biomol. Chem.* **2019**, *17*, 7192-7203.

(s4) This known compound has also been synthesized by other means: Chandrasekhar, S; Shrinidhi, A; Useful Extensions of the Henry Reaction: Expeditious Routes to Nitroalkanes and Nitroalkenes in Aqueous Media. *Synth. Commun.* **2014**, *44*, 3008-3018.

(s5) (a) For nearly all catalysts, the NHH'  $^1\text{H}$  NMR signals integrated to less than the theoretical value of 6H (a determination sometimes complicated by overlapping peaks). Complexes of this type can undergo H/D exchange with appropriate NMR solvents: Ghosh, S. K.; Lewis, K. G.; Kumar, A.; Gladysz, J. A. Syntheses of Families of Enantiopure and Diastereopure Cobalt Catalysts Derived from Trications of the Formula  $[\text{Co}(\text{NH}_2\text{CHArCHArNH}_2)_3]^{3+}$ . *Inorg. Chem.* **2017**, *56*, 2304-2320. (b) The following reference was helpful in assigning the NMR signals associated with  $\text{BAr}_f^-$ : Filippou, A. C.; Weidemann, N.; Schnakenburg, G.; Rohde, H.; Philippopoulos, A. L. Tungsten-Lead Triple Bonds: Syntheses, Structures, and Coordination Chemistry of the Plumbylidyne Complexes *trans*- $[\text{X}(\text{PMe}_3)_4\text{W}\equiv\text{P}(\text{2,6-Trip})_2\text{C}_6\text{H}_3)]$ . *Angew. Chem. Int. Ed.* **2004**, *43*, 6512-6516 and *Angew. Chem.* **2004**, *116*, 6674-6678.

(s6) The carboxylate  $^{13}\text{C}$  NMR signal, normally observed near 172 ppm, was not detected.

(s7) Ros Níguez, D.; Guillena, G.; Alonso, D.A.; Chiral 2-Aminobenzimidazoles in Deep

Eutectic Mixtures: Recyclable Organocatalysts for the Enantioselective Michael Addition of 1,3-Dicarbonyl Compounds to  $\beta$ -Nitroalkenes. *ACS Sustainable Chem. Eng.* **2017**, *5*, 10649-10656.

(s8) Ghosh, S.K.; Ganzmann, C.; Bhuvanesh, N.; Gladysz, J.A. Werner Complexes with  $\omega$ -Dimethylaminoalkyl Substituted Ethylenediamine Ligands: Bifunctional Hydrogen-Bond-Donor Catalysts for Highly Enantioselective Michael Additions. *Angew. Chem. Int. Ed.* **2016**, *55*, 4356-4360; Werner-Komplexe mit  $\omega$ -Dimethylaminoalkyl-substituierten Ethylendiaminliganden: bifunktionale H-Brückendonor-Katalysatoren für hoch enantioselektive Michael-Additionen. *Angew. Chem.* **2016**, *128*, 4429-4433.

(s9) Bécart, D.; Dimer, V.; Salaün, A.; Oiarbide, M.; Reddy Nelli, Y.; Kauffmann, B.; Fischer, L.; Palomo, C.; Guichard, G. Helical Oligoureia Foldamers as Powerful Hydrogen Bonding Catalysts for Enantioselective C–C Bond-Forming Reactions. *J. Am. Chem. Soc.* **2017**, *139*, 12524-12532.

(s10) Li, F.; Li, Y.-Z.; Jia, Z.-S.; Xu, M.-H.; Tian, P.; Lin, G.-Q. Biscinchona alkaloids as highly efficient bifunctional organocatalysts for the asymmetric conjugate addition of malonates to nitroalkenes at ambient temperature. *Tetrahedron* **2011**, *67*, 10186-10194.

(s11) Ishitani, H.; Kanai, K.; Yoo, W.-J.; Yoshida, T.; Kobayashi, S.; A Nickel-Diamine/Mesoporous Silica Composite as a Heterogeneous Chiral Catalyst for Asymmetric 1,4-Addition Reactions. *Angew. Chem. Int. Ed.* **2019**, *58*, 13313-13317; *Angew. Chem.* **2019**, *131*, 13447-13451.

(s12) Kumar, A; Ghosh, S. K.; Gladysz, J. A.; Tris(1,2-diphenylethylenediamine)cobalt(III) Complexes: Chiral Hydrogen Bond Donor Catalysts for Enantioselective  $\alpha$ -Aminations of 1,3-Dicarbonyl Compounds. *Org. Lett.* **2016**, *18*, 760-763.

(s13) (a) Wang, L-K; Zhou, J-J; Lan, Y-B; Ding, S-Y; Yu, W; Wang, W; Divergent Synthesis of Chiral Covalent Organic Frameworks. *Angew. Chem. Int. Ed.* **2019**, *58*, 9443-9447; *Angew. Chem.* **2019**, *131*, 9543-9547. (b) Our retentions times are somewhat shorter than those reported due to the age of the HPLC column.



# $^1\text{H}$ and $^{13}\text{C}\{^1\text{H}\}$ NMR spectra of catalysts

$\Lambda$ -(*S,S*)-**2**<sup>3+</sup> **4a**-Cl-BAr<sub>f</sub><sup>-</sup> • 2H<sub>2</sub>O in acetone-*d*<sub>6</sub>, 500 MHz

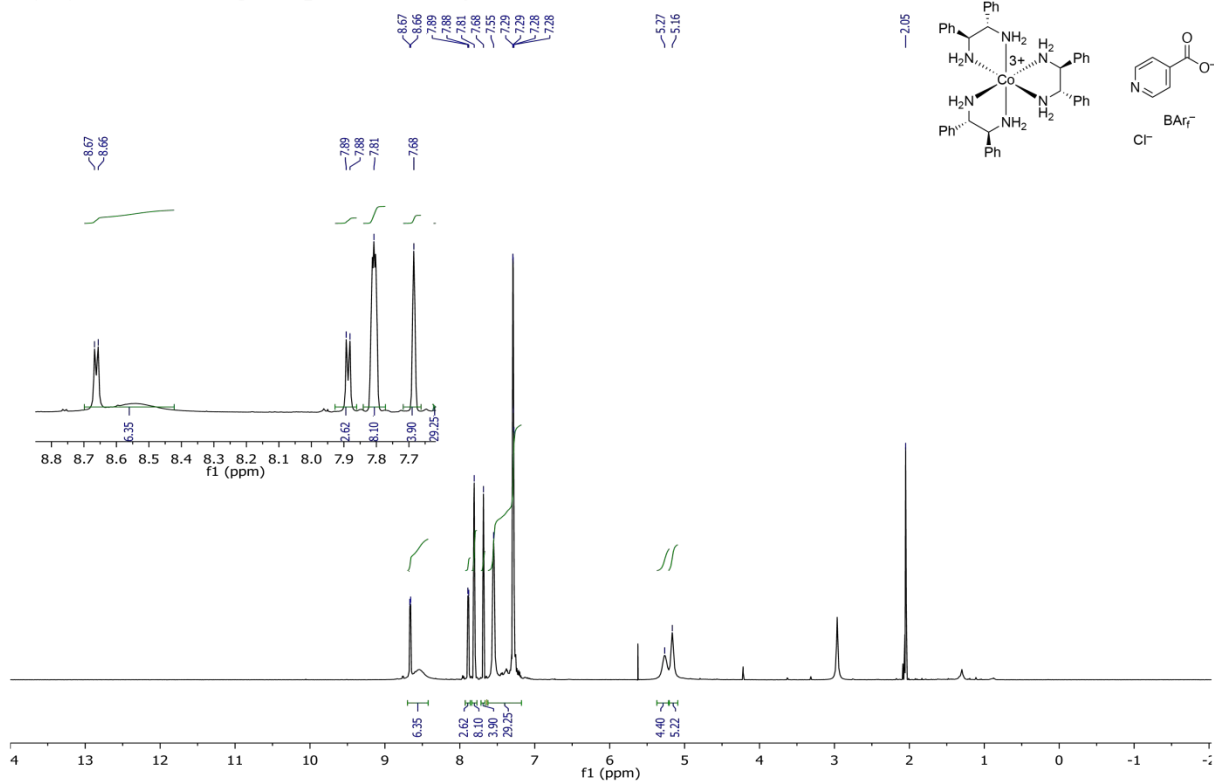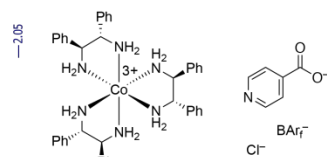

$\Lambda$ -(*S,S*)-**2**<sup>3+</sup> **4a**-Cl-BAr<sub>f</sub><sup>-</sup> • 2H<sub>2</sub>O in acetone-*d*<sub>6</sub>, 125 MHz

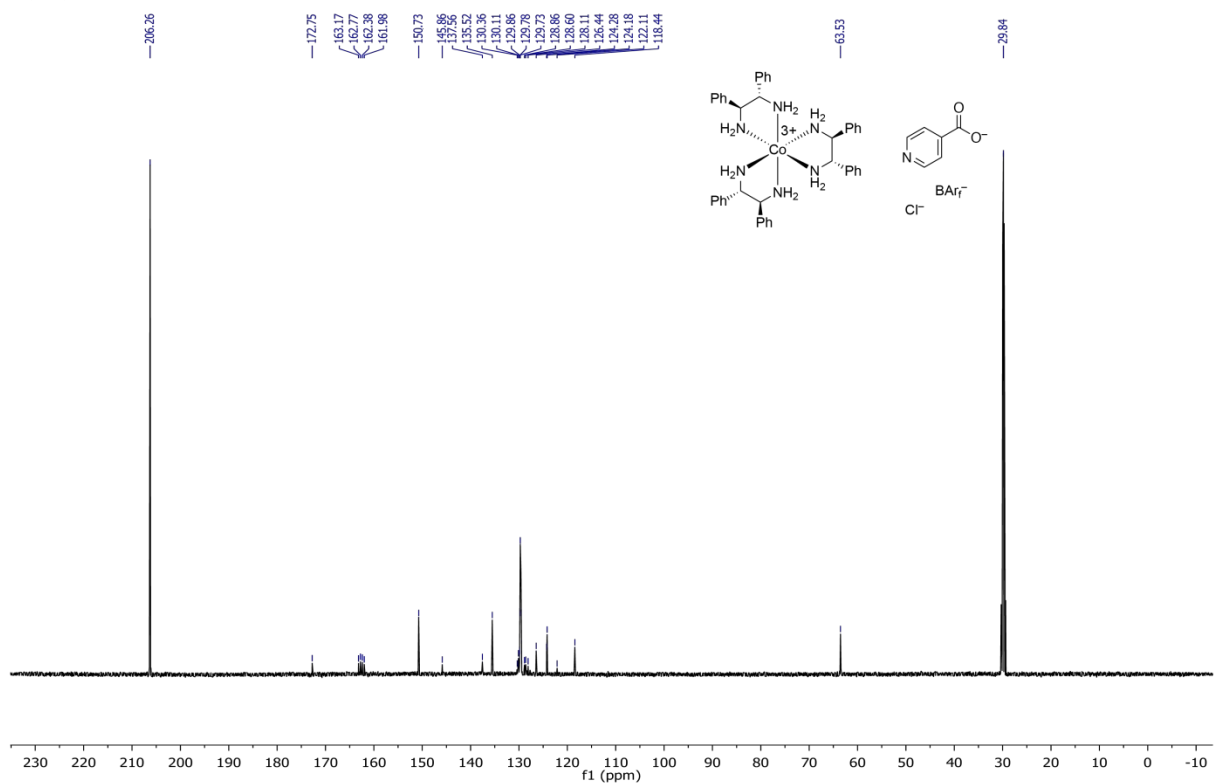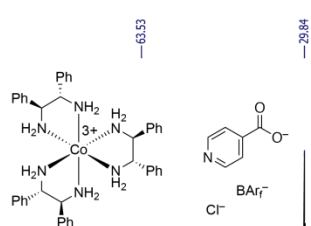

$\Lambda$ -(*S,S*)-**2**<sup>3+</sup> **4b**-Cl-BAr<sub>f</sub><sup>-</sup> • 2H<sub>2</sub>O in acetone-*d*<sub>6</sub>, 500 MHz

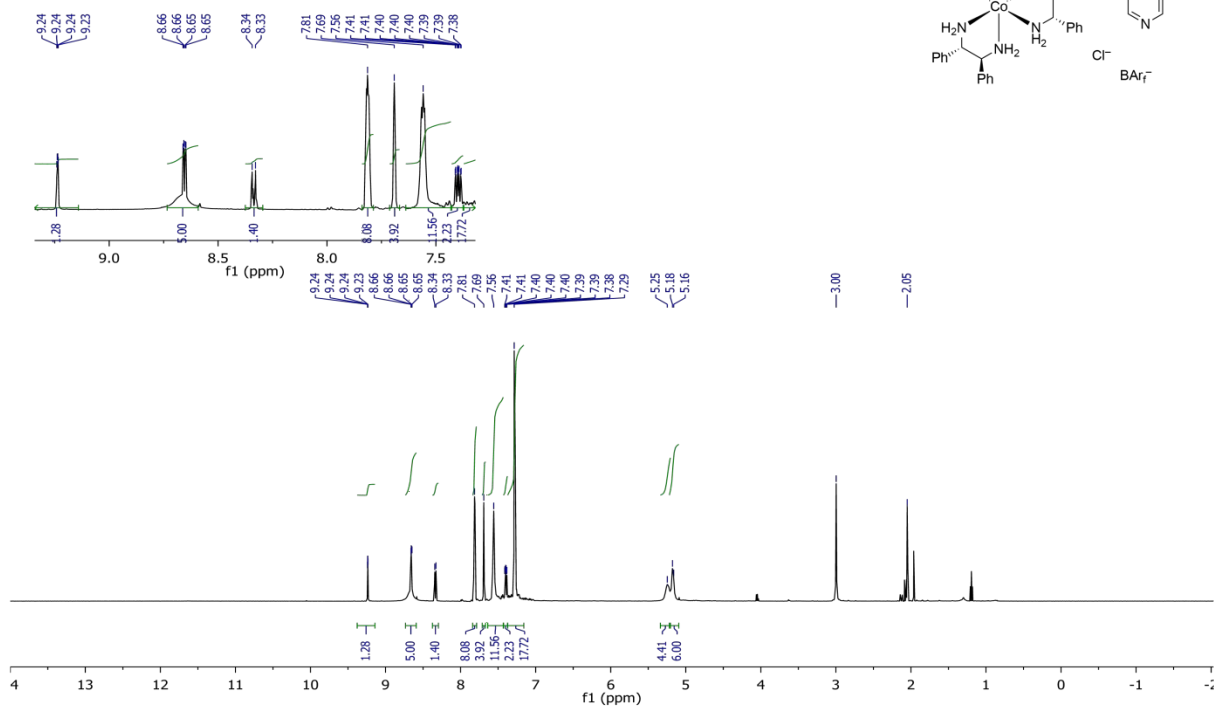

$\Lambda$ -(*S,S*)-**2**<sup>3+</sup> **4b**-Cl-BAr<sub>f</sub><sup>-</sup> • 2H<sub>2</sub>O in acetone-*d*<sub>6</sub>, 125 MHz

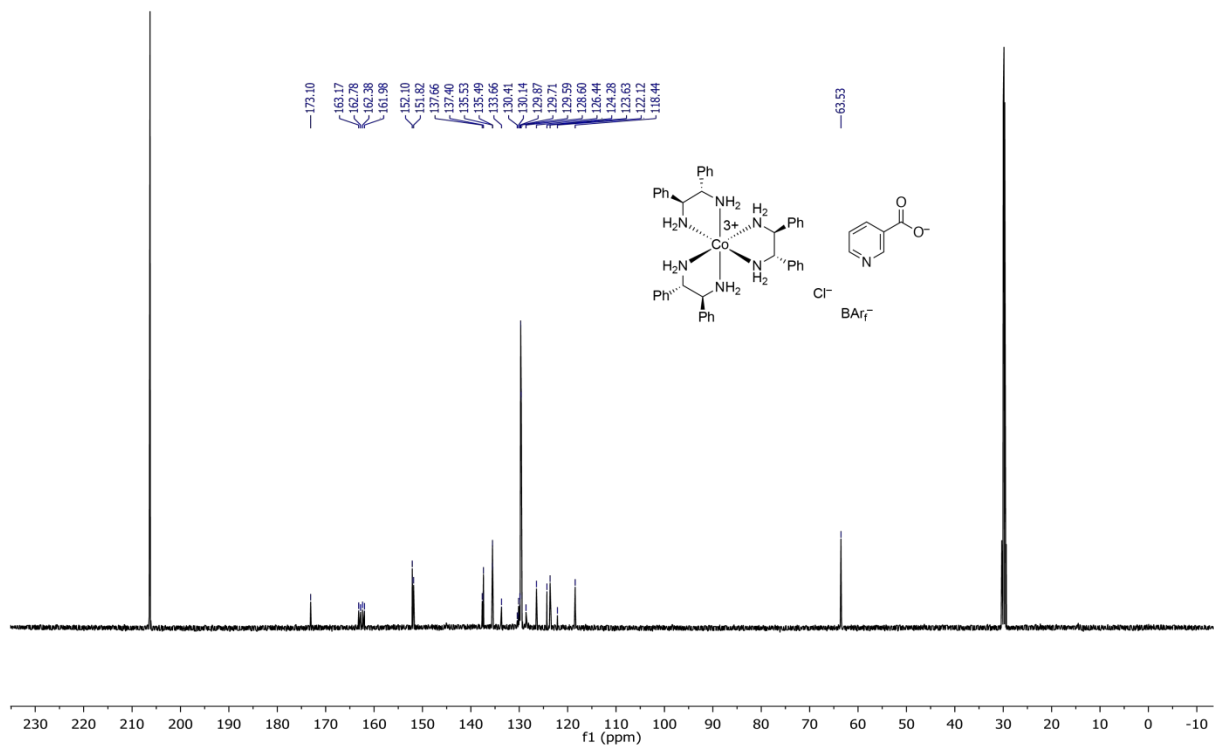

$\Delta$ -(*S,S*)-**2**<sup>3+</sup> **4b**-Cl-BAr<sub>f</sub><sup>-</sup> • 2H<sub>2</sub>O in acetone-*d*<sub>6</sub>, 500 MHz

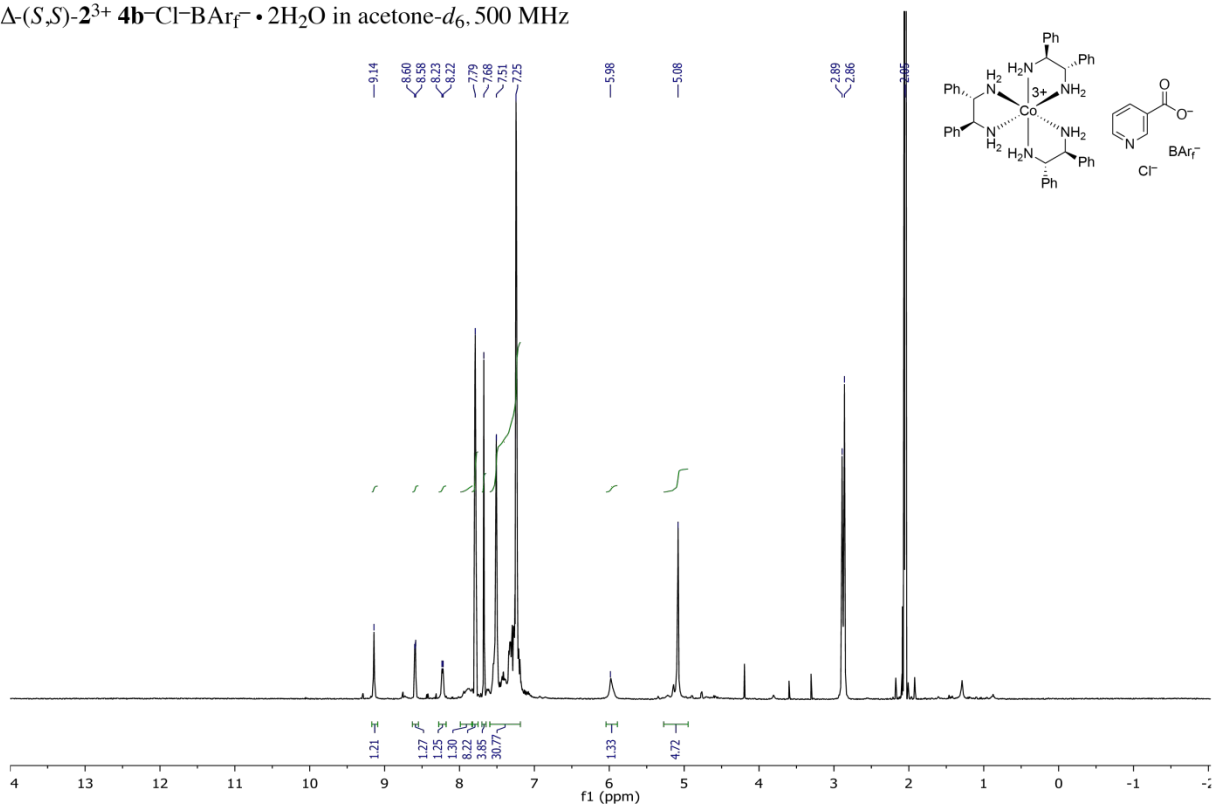

$\Delta$ -(*S,S*)-**2**<sup>3+</sup> **4b**-Cl-BAr<sub>f</sub><sup>-</sup> • 2H<sub>2</sub>O in acetone-*d*<sub>6</sub>, 125 MHz

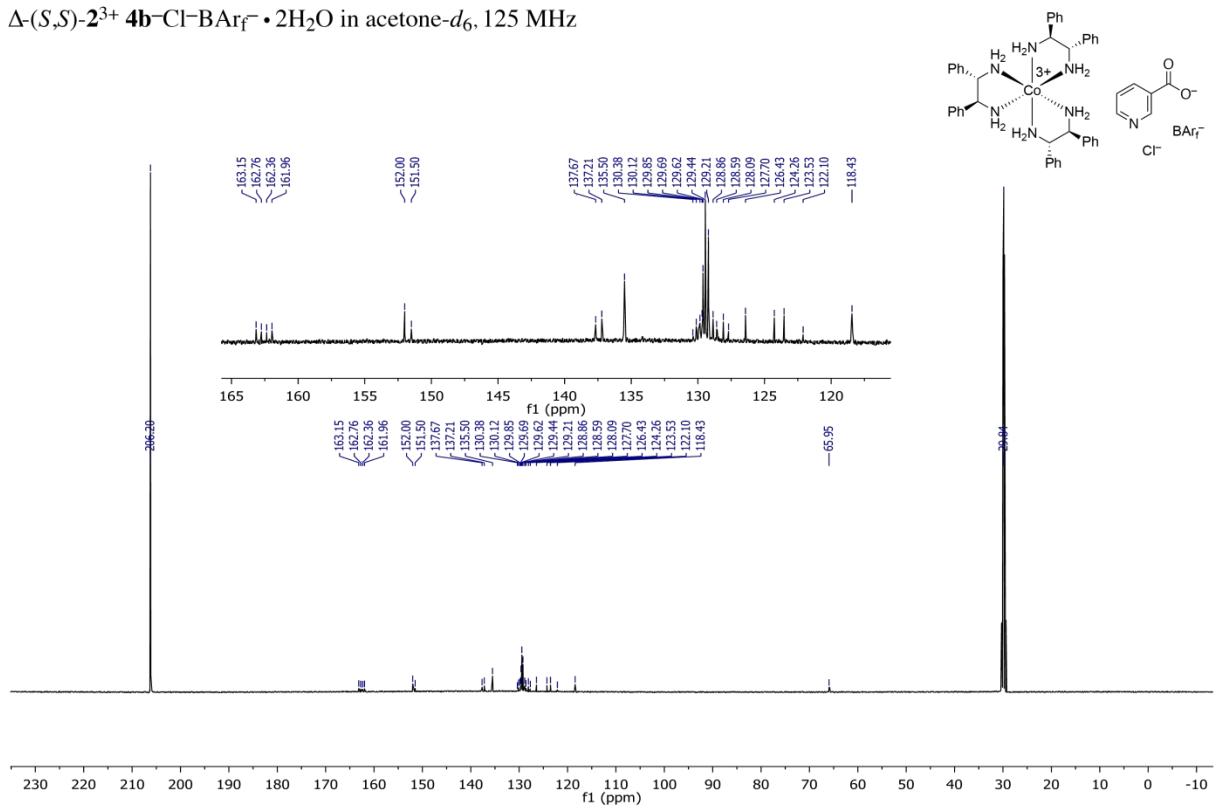

$\Lambda$ -(*S,S*)-**2**<sup>3+</sup> **4c**-Cl-BAr<sub>f</sub><sup>-</sup> • 2H<sub>2</sub>O in acetone-*d*<sub>6</sub>, 500 MHz

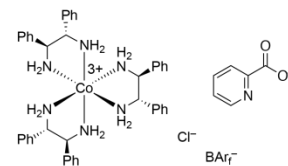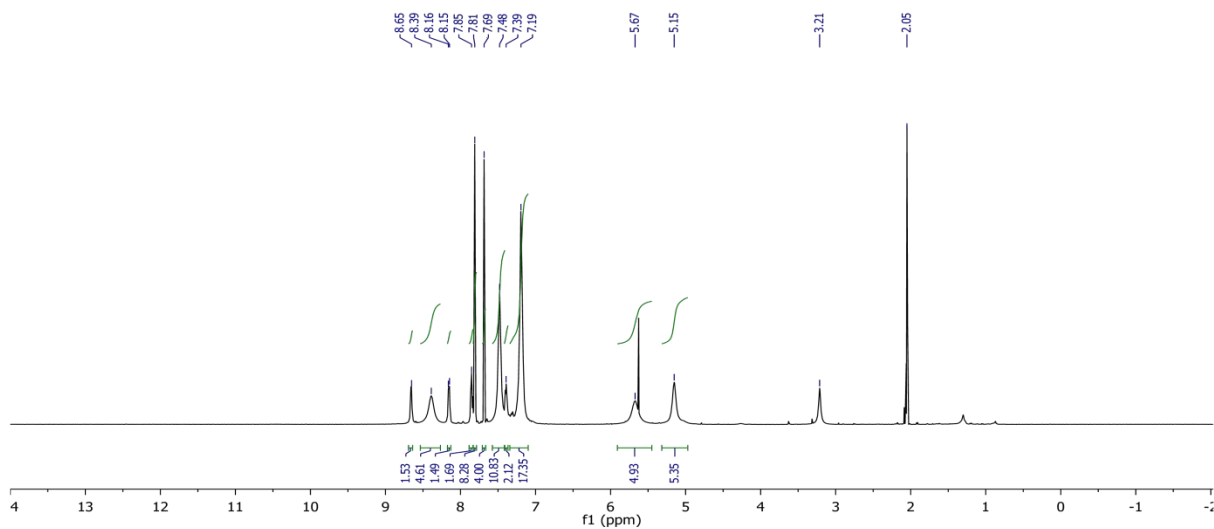

$\Lambda$ -(*S,S*)-**2**<sup>3+</sup> **4c**-Cl-BAr<sub>f</sub><sup>-</sup> • 2H<sub>2</sub>O in acetone-*d*<sub>6</sub>, 125 MHz

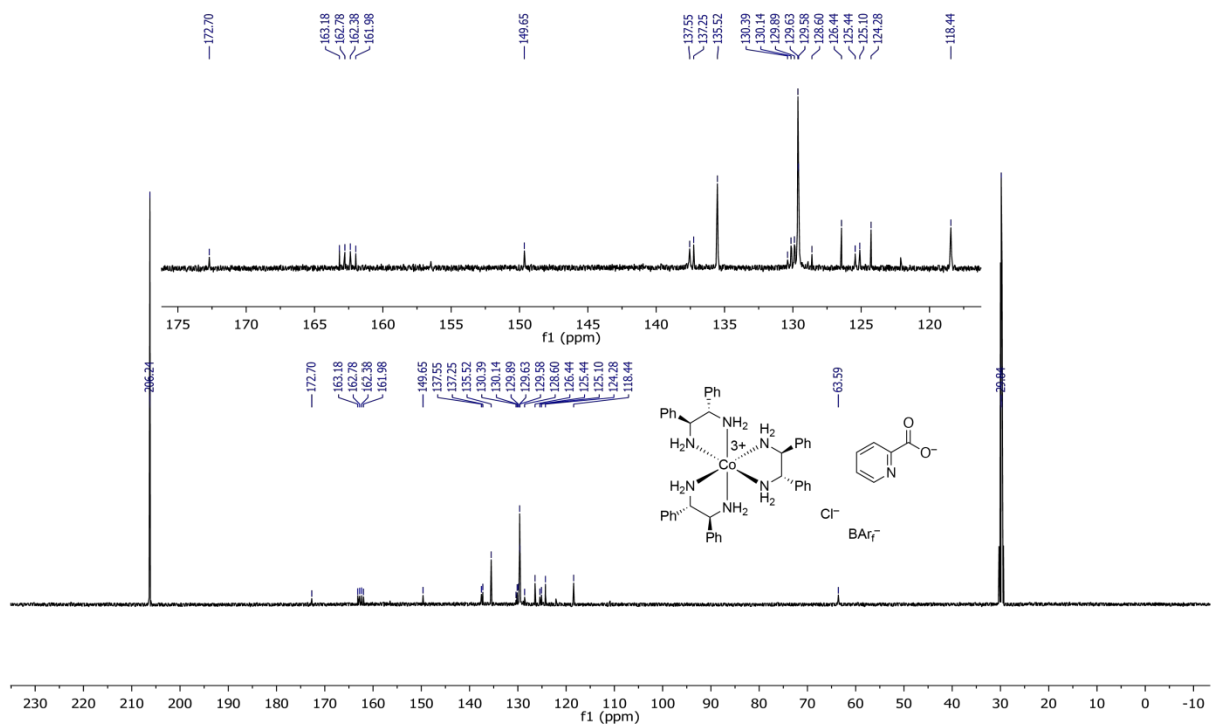

$\Lambda$ -(*S,S*)-**2**<sup>3+</sup> **4d**-Cl-BAr<sub>f</sub><sup>-</sup> • 2H<sub>2</sub>O in acetone-*d*<sub>6</sub>, 500 MHz

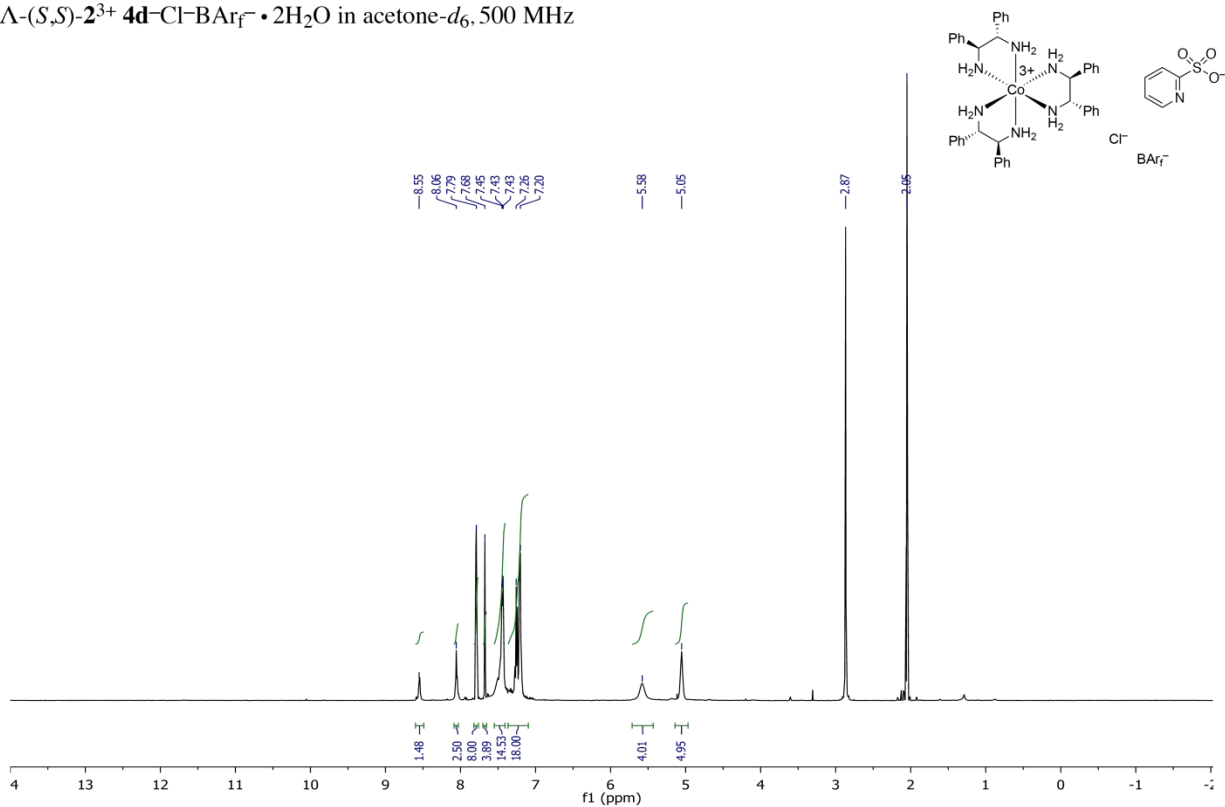

$\Lambda$ -(*S,S*)-**2**<sup>3+</sup> **4d**-Cl-BAr<sub>f</sub><sup>-</sup> • 2H<sub>2</sub>O in acetone-*d*<sub>6</sub>, 125 MHz

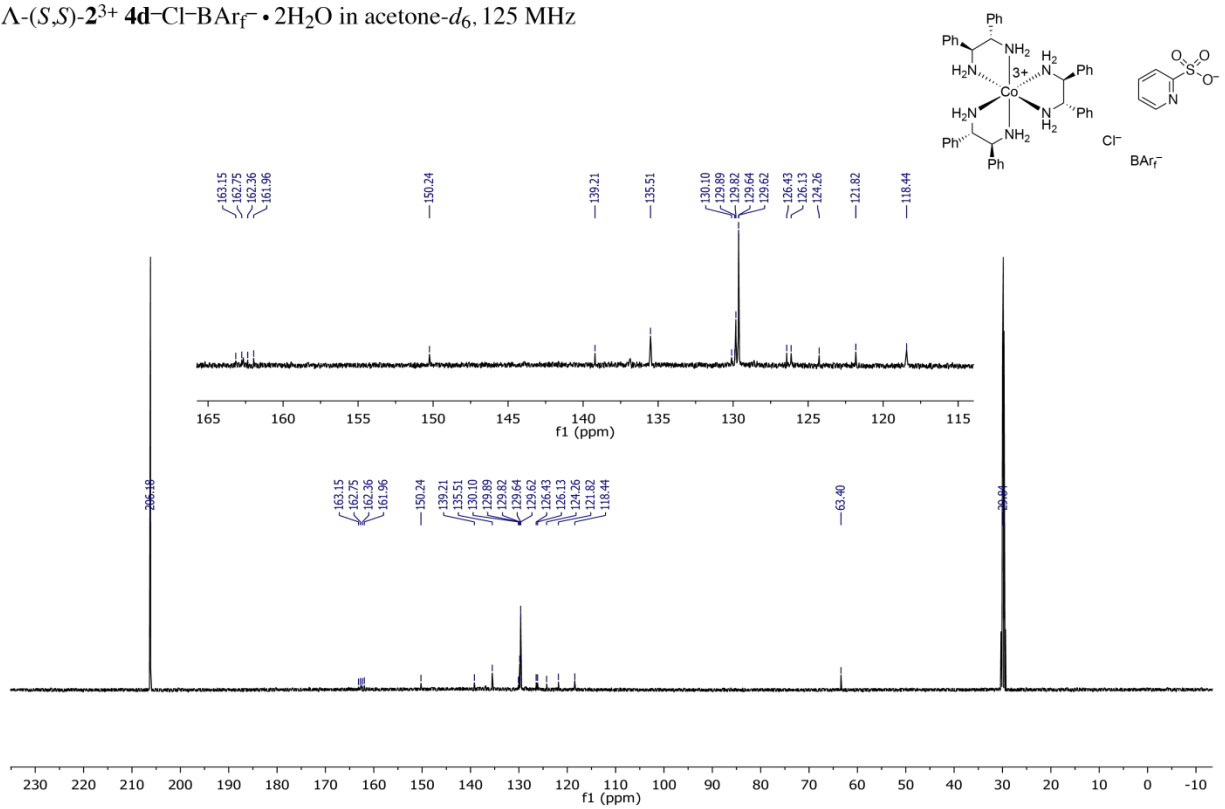

$\Lambda$ -(*S,S*)-**2**<sup>3+</sup> **4e**-Cl-BAr<sub>F</sub><sup>-</sup> • 2H<sub>2</sub>O in acetone-*d*<sub>6</sub>, 500 MHz

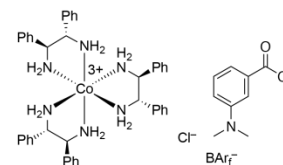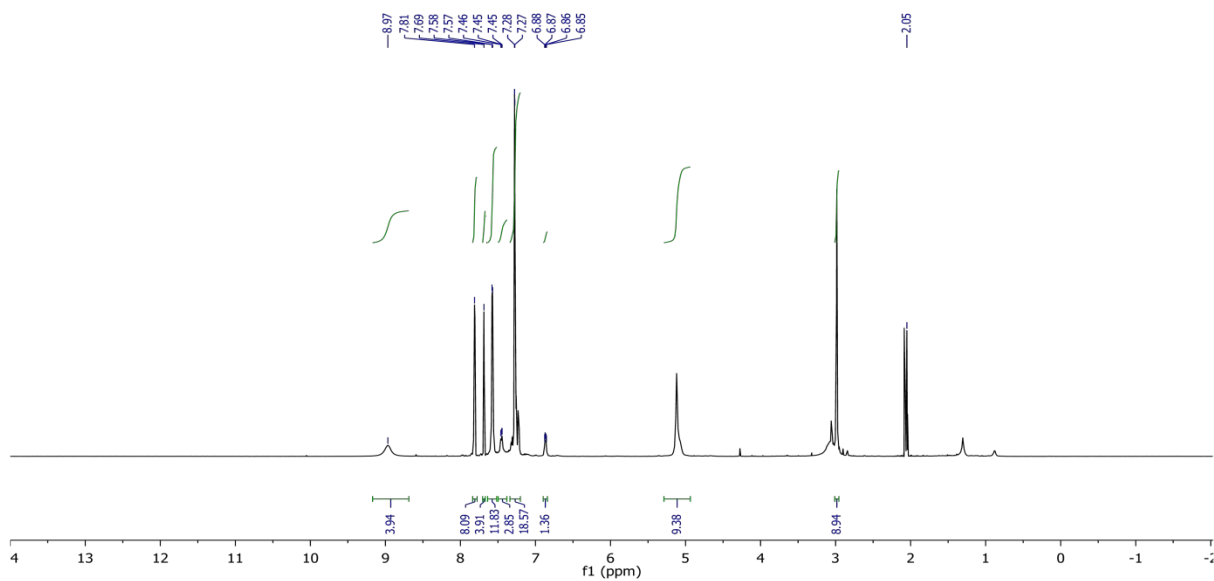

$\Lambda$ -(*S,S*)-**2**<sup>3+</sup> **4e**-Cl-BAr<sub>F</sub><sup>-</sup> • 2H<sub>2</sub>O in acetone-*d*<sub>6</sub>, 125 MHz

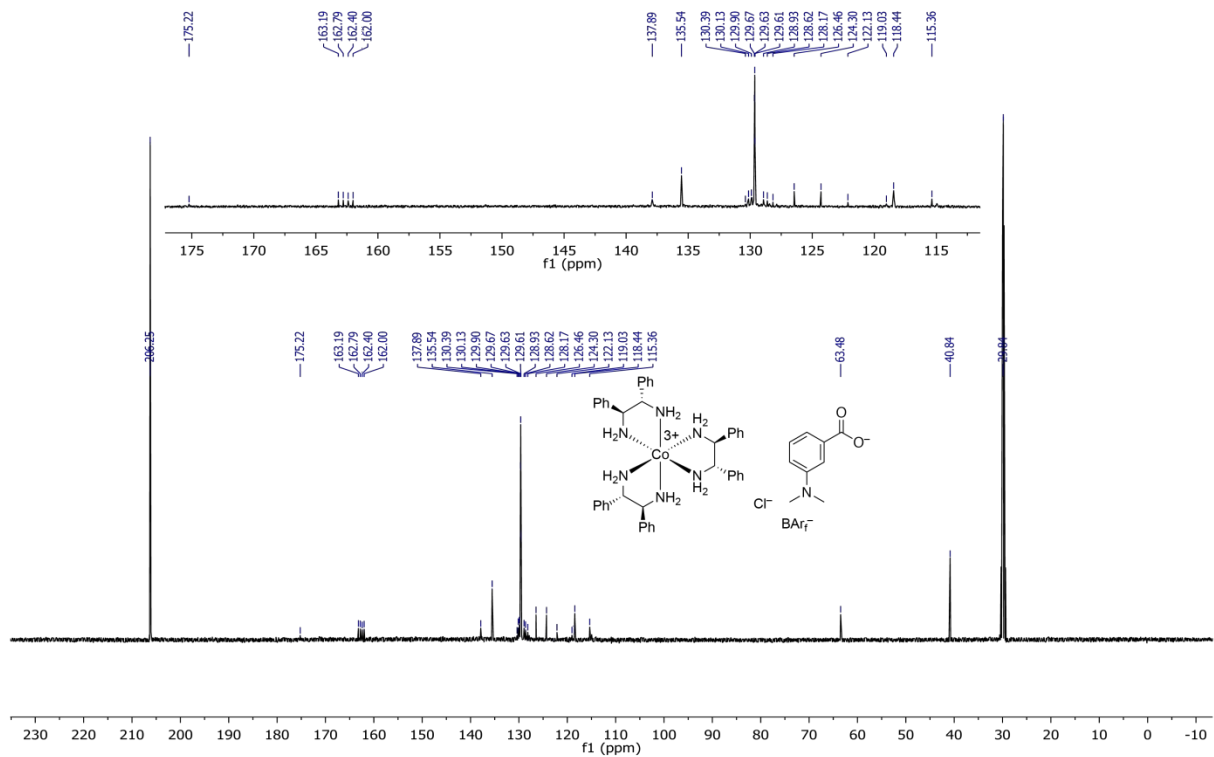

$\Lambda$ -(*S,S*)-**2**<sup>3+</sup> **4f**-Cl-BAr<sub>f</sub><sup>-</sup> • 2H<sub>2</sub>O in acetone-*d*<sub>6</sub>, 500 MHz

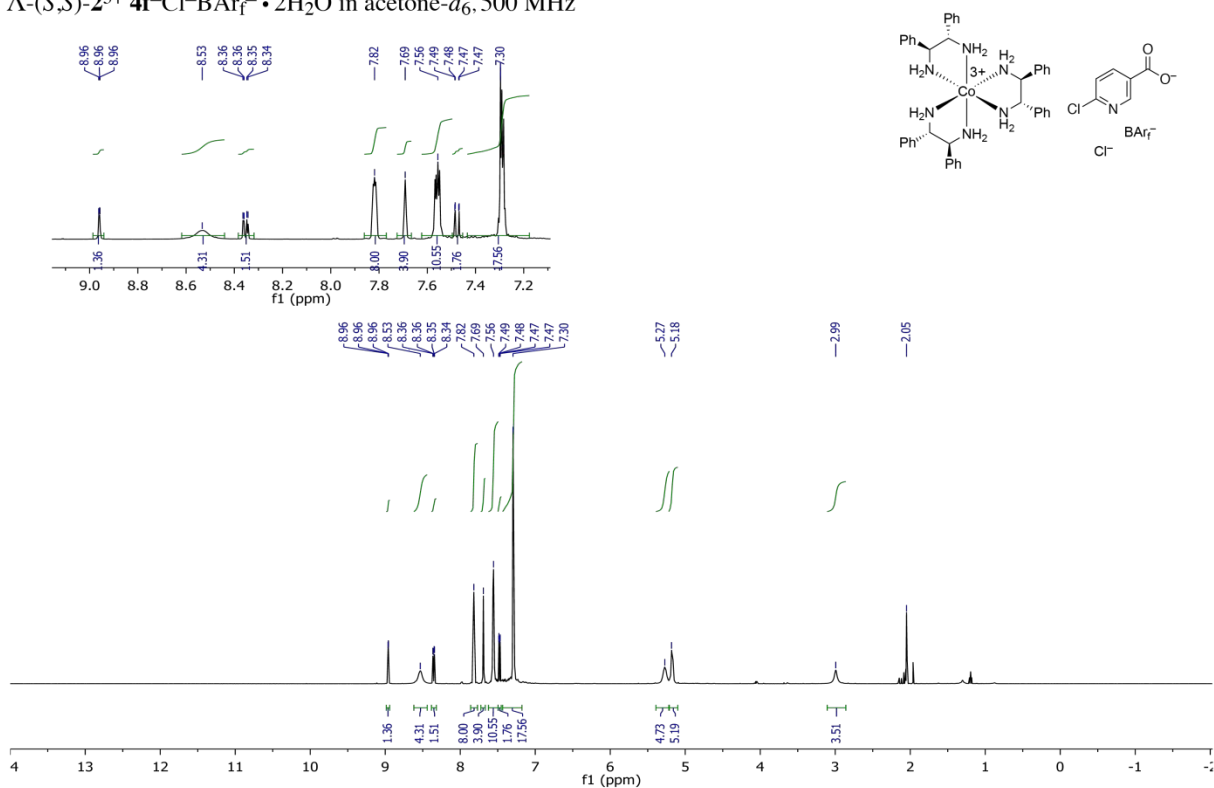

$\Lambda$ -(*S,S*)-**2**<sup>3+</sup> **4f**-Cl-BAr<sub>f</sub><sup>-</sup> • 2H<sub>2</sub>O in acetone-*d*<sub>6</sub>, 125 MHz

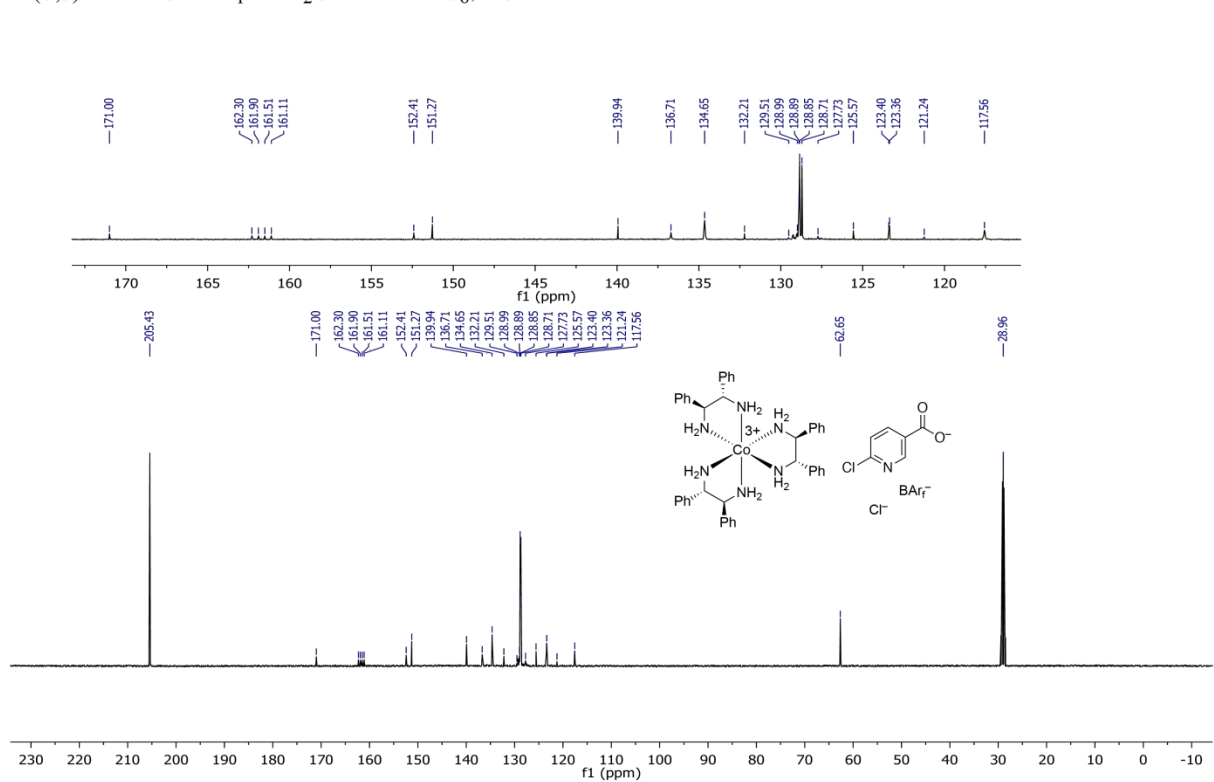

The image shows the chemical structure of a cobalt(II) complex and the barbiturate ligand. The cobalt(II) complex is a tris(1-phenyl-2-aminoethyl)amine cobalt(II) complex, where a central cobalt atom is coordinated by three 1-phenylethylamine ligands. The ligands are shown in a propeller-like arrangement around the cobalt center, with one ligand in the plane of the paper, one coming out, and one going in. The barbiturate ligand is shown as a pyrimidine-2,4,6-trione derivative, specifically 5-methoxy-1,3,5-triazine-2,4,6-trione, with a methoxy group at the 5-position and a negative charge on one of the carbonyl oxygens. The counterion is a chloride ion (Cl<sup>-</sup>).

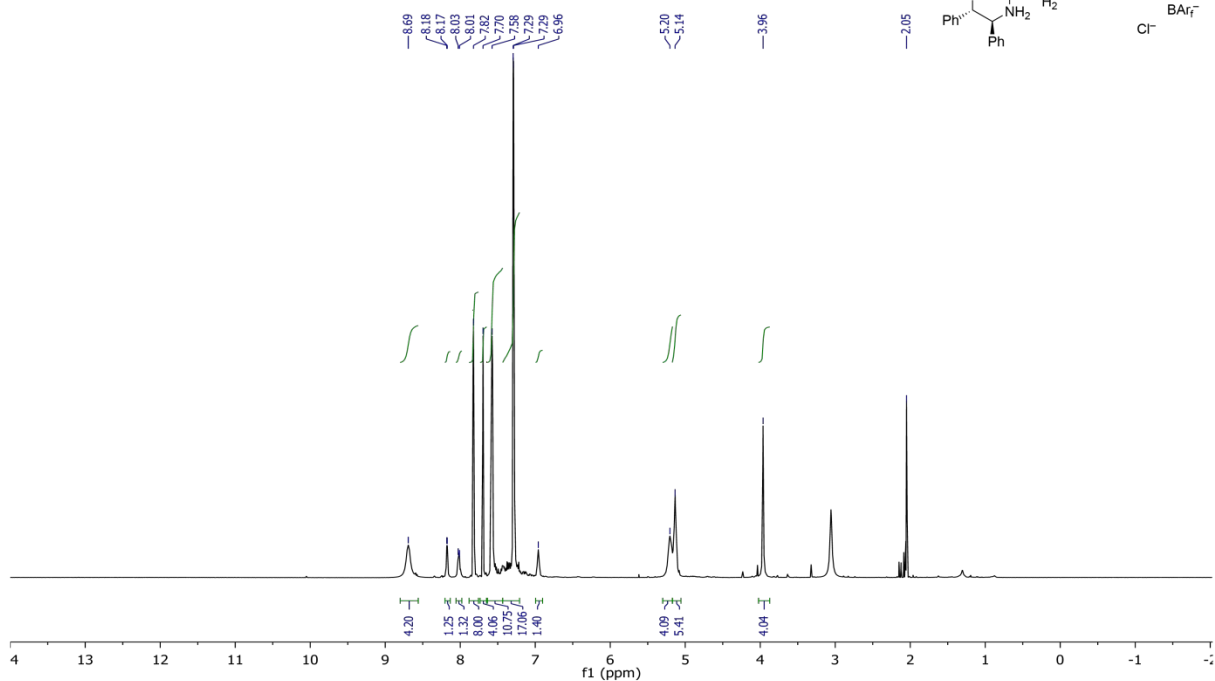COC1=CC=C(C(=O)[O-])N=C1.[Cl-].[B-](F)(F)F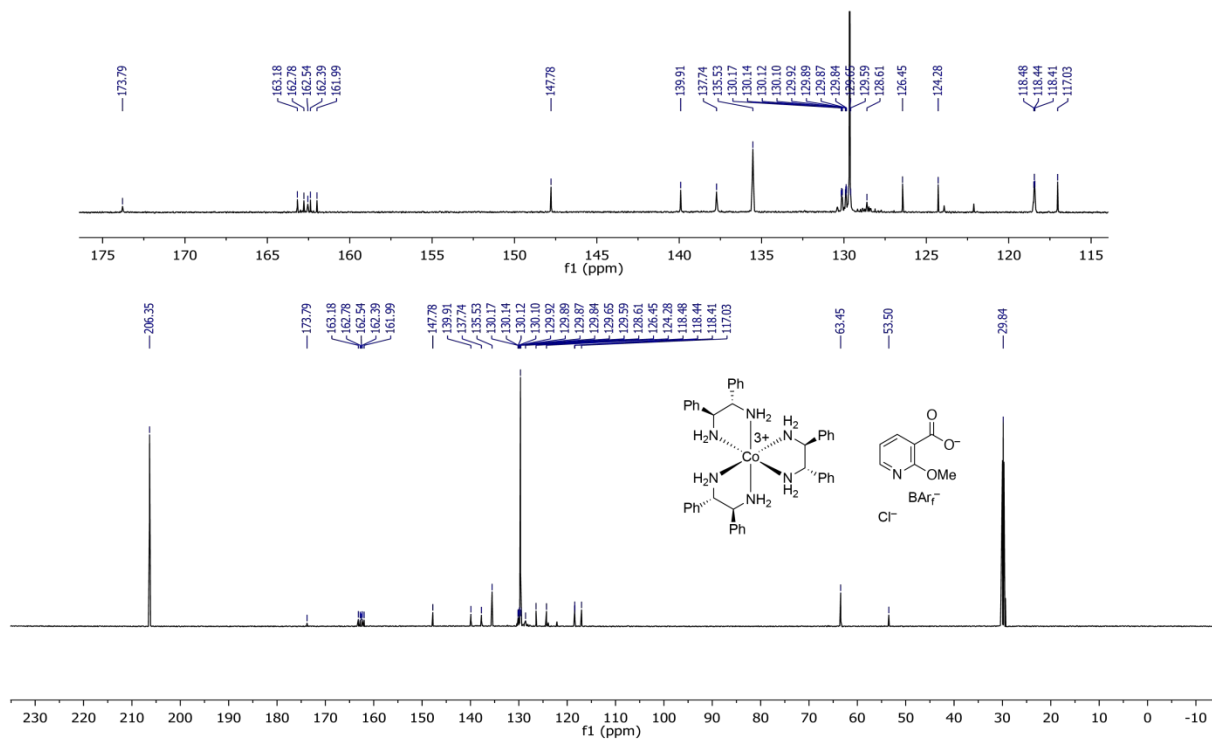



$\Lambda$ -(*S,S*)-**2**<sup>3+</sup> **4h**-Cl-BAr<sub>f</sub><sup>-</sup> • 2H<sub>2</sub>O in acetone-*d*<sub>6</sub>, 500 MHz

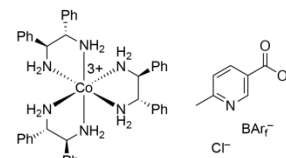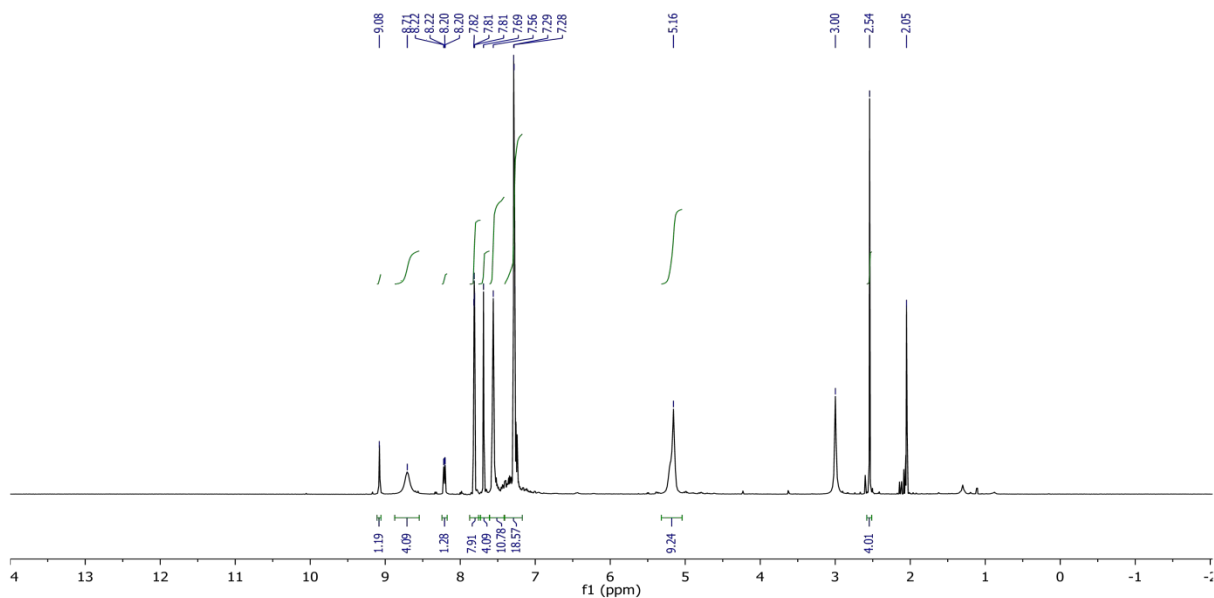

$\Lambda$ -(*S,S*)-**2**<sup>3+</sup> **4h**-Cl-BAr<sub>f</sub><sup>-</sup> • 2H<sub>2</sub>O in acetone-*d*<sub>6</sub>, 125 MHz

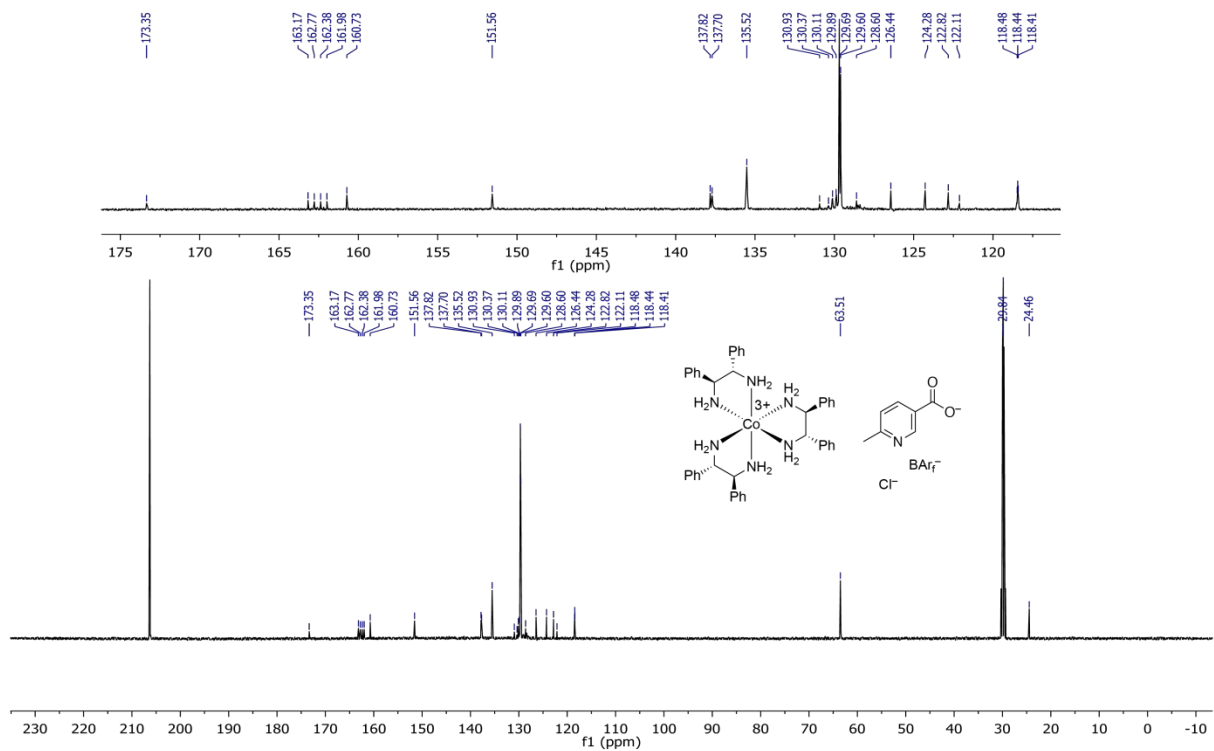

$\Lambda$ -(*S,S*)-**2**<sup>3+</sup> **4i**-Cl-BAr<sub>f</sub><sup>-</sup> • 2H<sub>2</sub>O in acetone-*d*<sub>6</sub>, 500 MHz

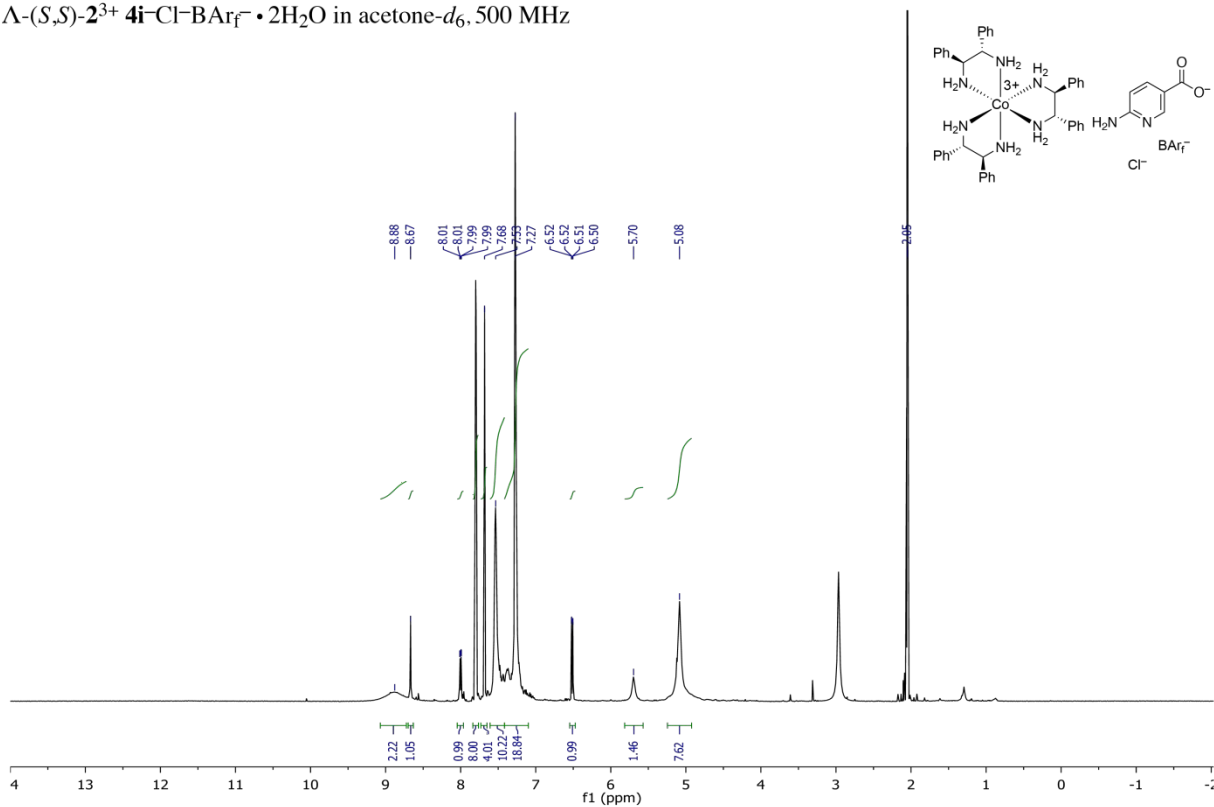

$\Lambda$ -(*S,S*)-**2**<sup>3+</sup> **4i**-Cl-BAr<sub>f</sub><sup>-</sup> • 2H<sub>2</sub>O in acetone-*d*<sub>6</sub>, 125 MHz

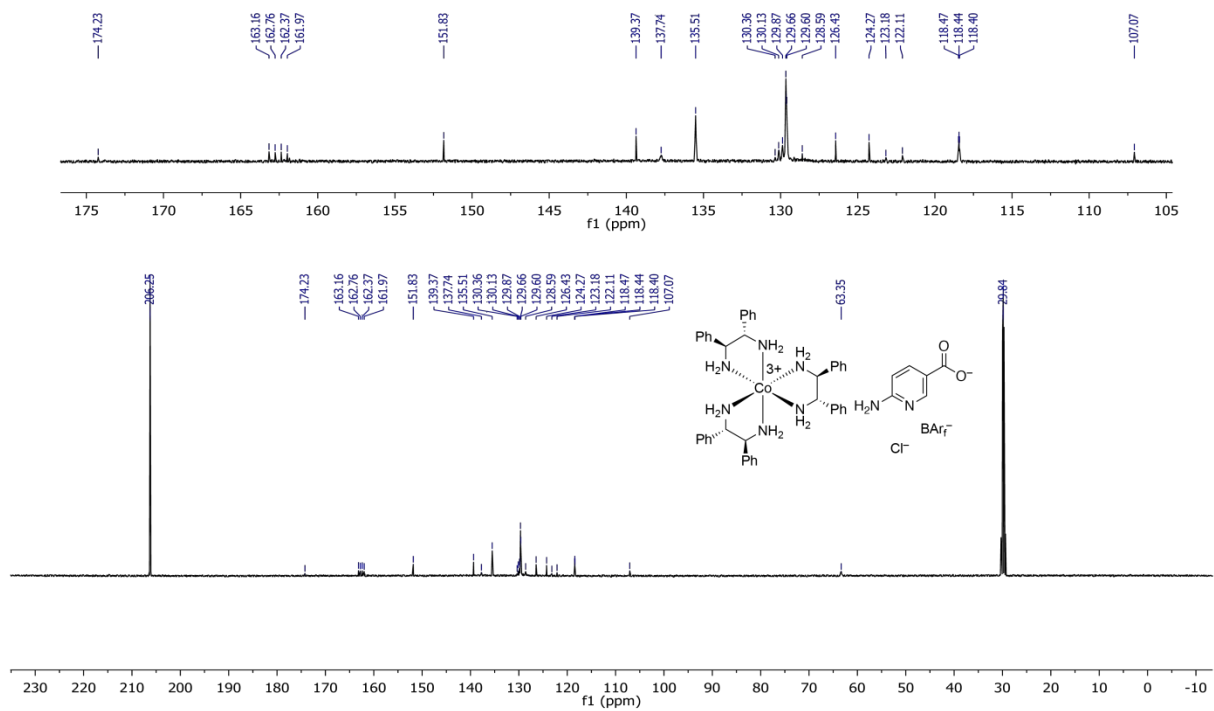

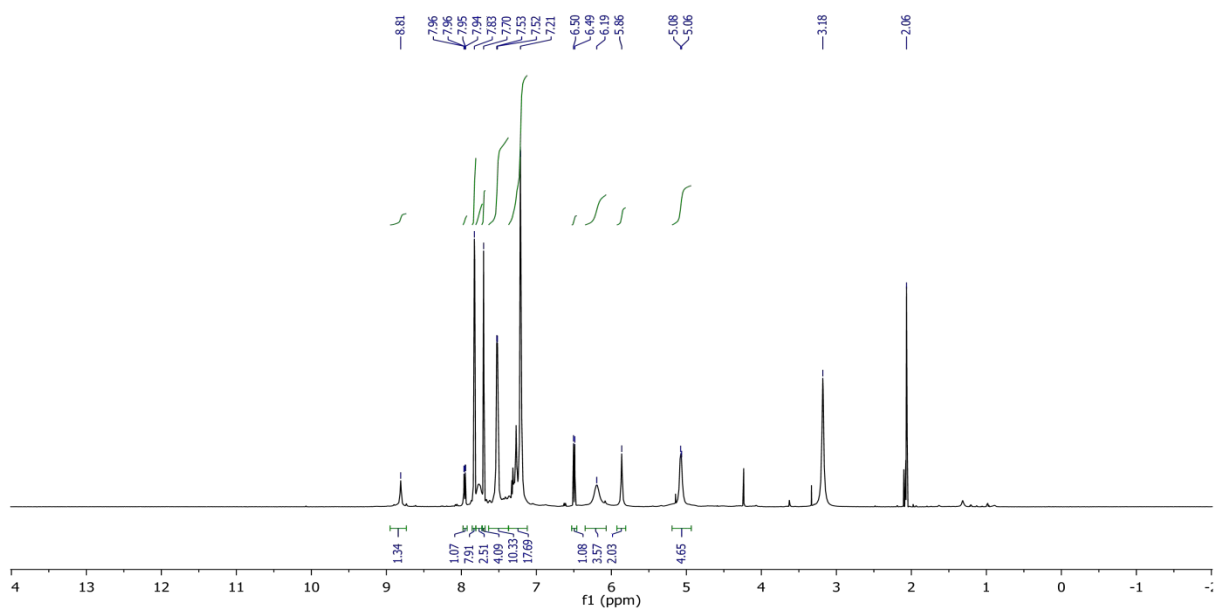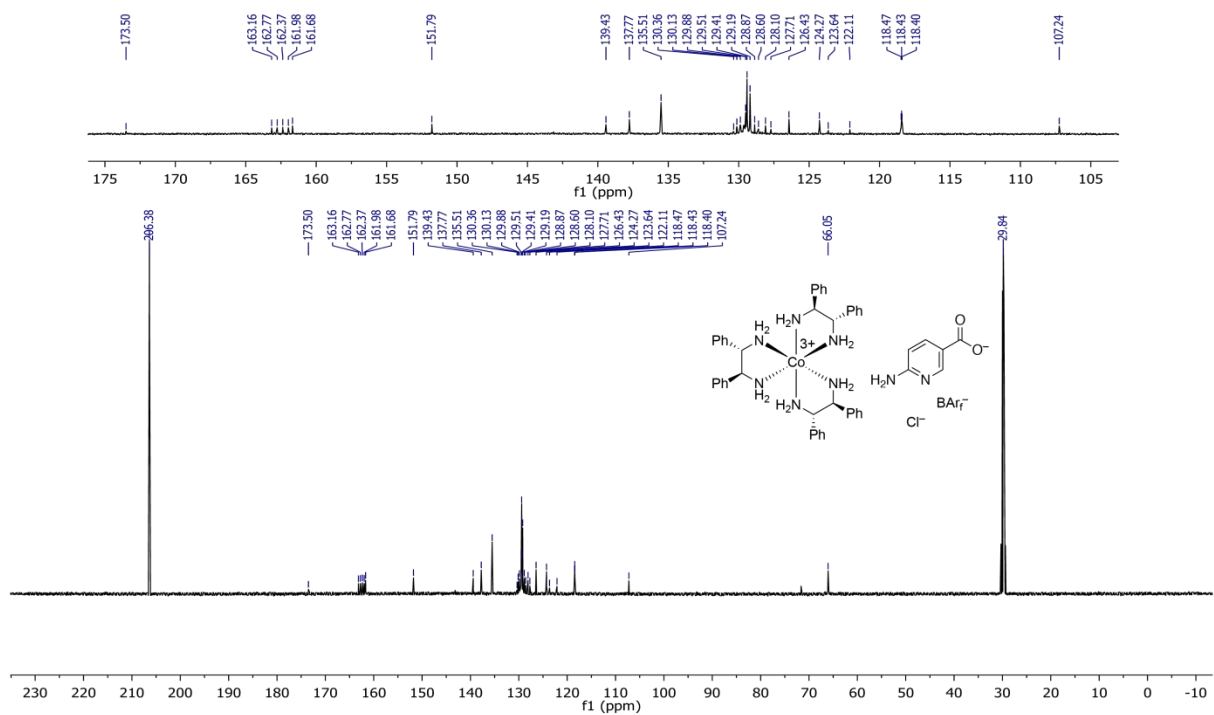

**HPLC Traces** (traces for racemates of nearly all of the following compounds can be found in the earlier references s1, s8, and s12).

mAU

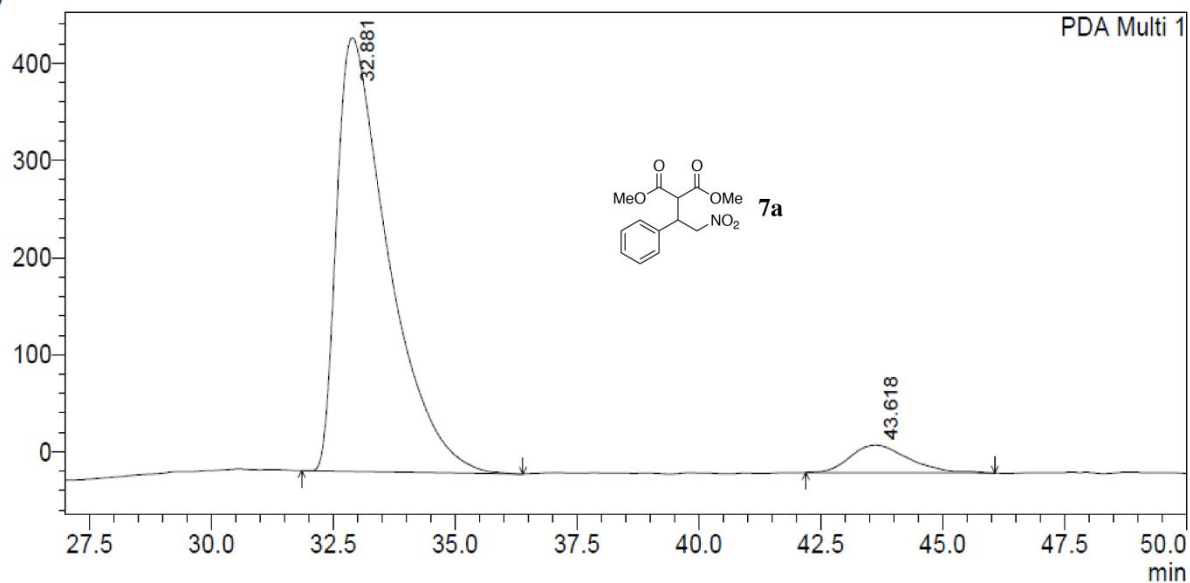

1 PDA Multi 1/220nm 4nm

PeakTable

PDA Ch1 220nm 4nm

| Peak# | Ret. Time | Area     | Height | Area %  | Height % |
|-------|-----------|----------|--------|---------|----------|
| 1     | 32.881    | 32859195 | 446548 | 93.222  | 94.002   |
| 2     | 43.618    | 2389229  | 28495  | 6.778   | 5.998    |
| Total |           | 35248424 | 475043 | 100.000 | 100.000  |

mAU

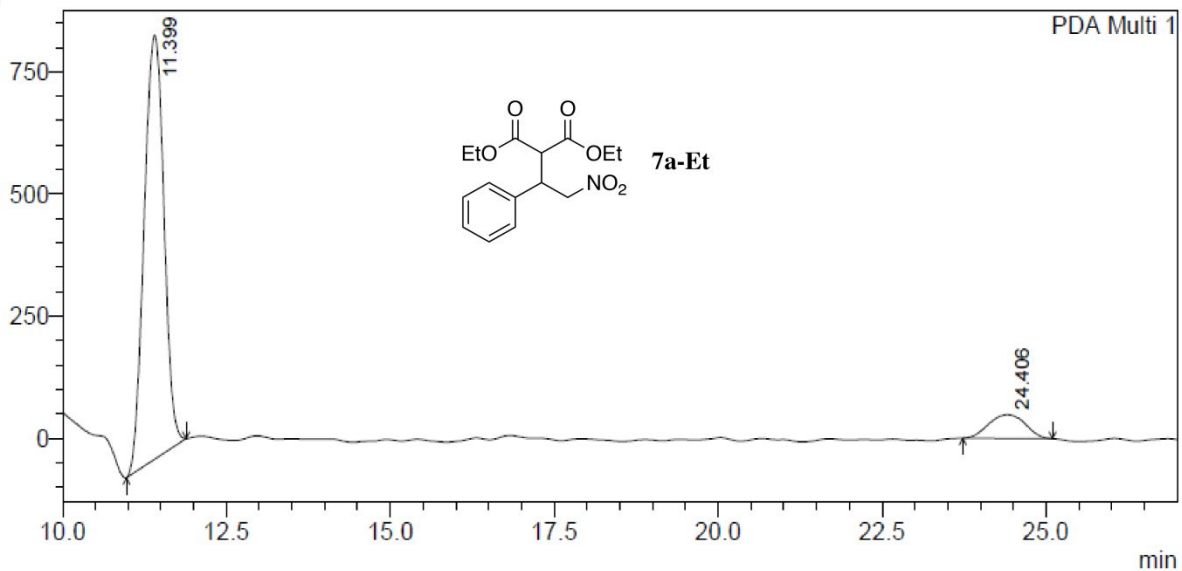

1 PDA Multi 1/230nm 4nm

PeakTable

PDA Ch1 230nm 4nm

| Peak# | Ret. Time | Area     | Height | Area %  | Height % |
|-------|-----------|----------|--------|---------|----------|
| 1     | 11.399    | 18230992 | 867742 | 90.622  | 94.700   |
| 2     | 24.406    | 1886690  | 48561  | 9.378   | 5.300    |
| Total |           | 20117683 | 916303 | 100.000 | 100.000  |

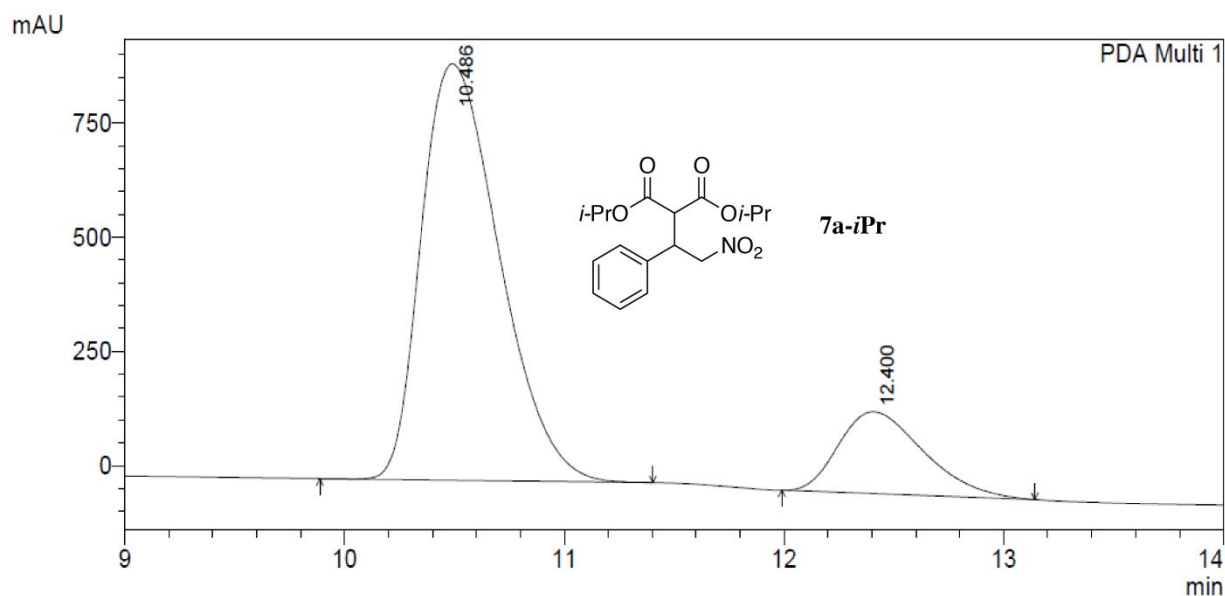

1 PDA Multi 1/220nm 4nm

PeakTable

PDA Ch1 220nm 4nm

| Peak# | Ret. Time | Area     | Height  | Area %  | Height % |
|-------|-----------|----------|---------|---------|----------|
| 1     | 10.486    | 22512749 | 910958  | 82.386  | 83.565   |
| 2     | 12.400    | 4813147  | 179158  | 17.614  | 16.435   |
| Total |           | 27325896 | 1090115 | 100.000 | 100.000  |

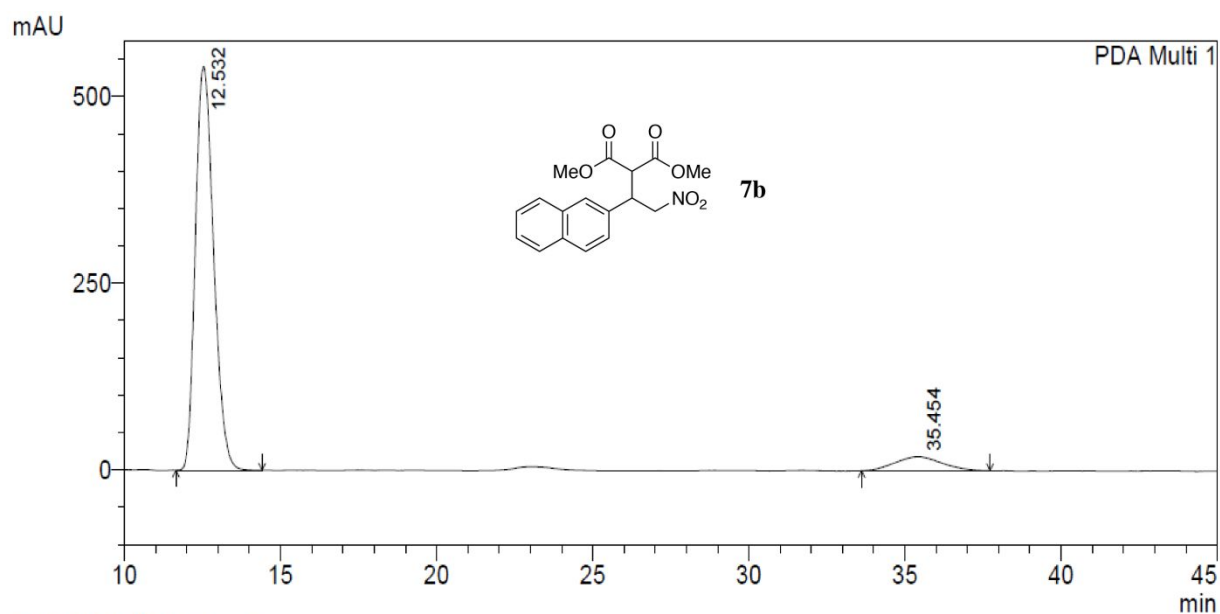

1 PDA Multi 1/254nm 4nm

PeakTable

PDA Ch1 254nm 4nm

| Peak# | Ret. Time | Area     | Height | Area %  | Height % |
|-------|-----------|----------|--------|---------|----------|
| 1     | 12.532    | 22001804 | 541358 | 91.843  | 96.668   |
| 2     | 35.454    | 1954107  | 18662  | 8.157   | 3.332    |
| Total |           | 23955910 | 560020 | 100.000 | 100.000  |

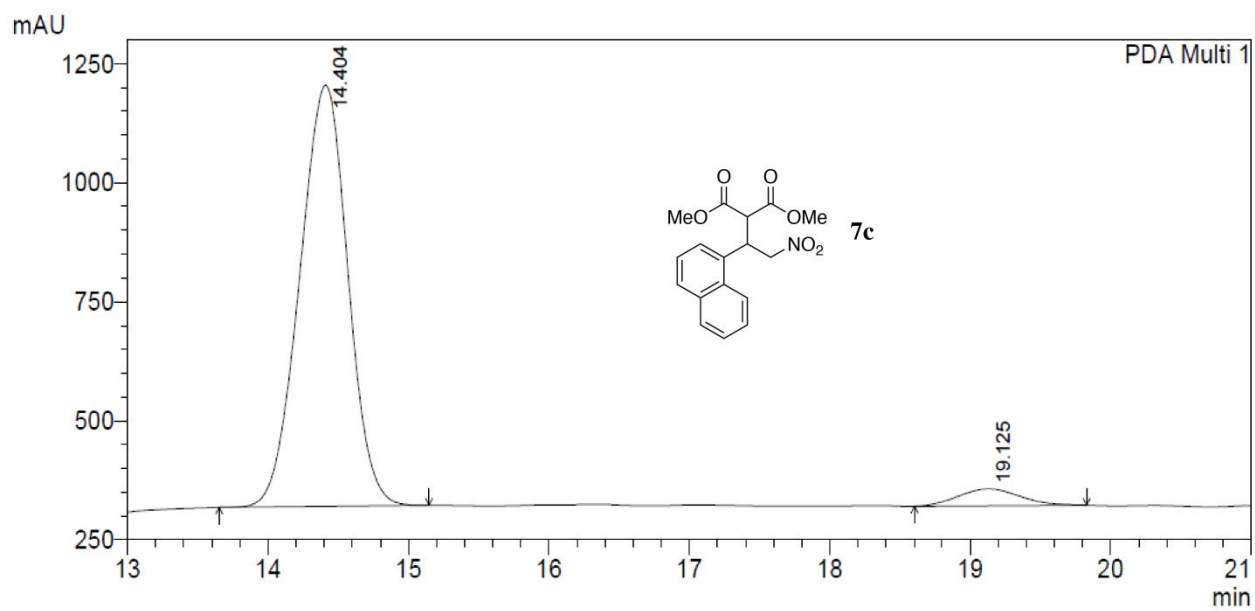

1 PDA Multi 1/254nm 4nm

PeakTable

PDA Ch1 254nm 4nm

| Peak# | Ret. Time | Area     | Height | Area %  | Height % |
|-------|-----------|----------|--------|---------|----------|
| 1     | 14.404    | 21101952 | 884579 | 95.177  | 96.158   |
| 2     | 19.125    | 1069249  | 35341  | 4.823   | 3.842    |
| Total |           | 22171200 | 919920 | 100.000 | 100.000  |

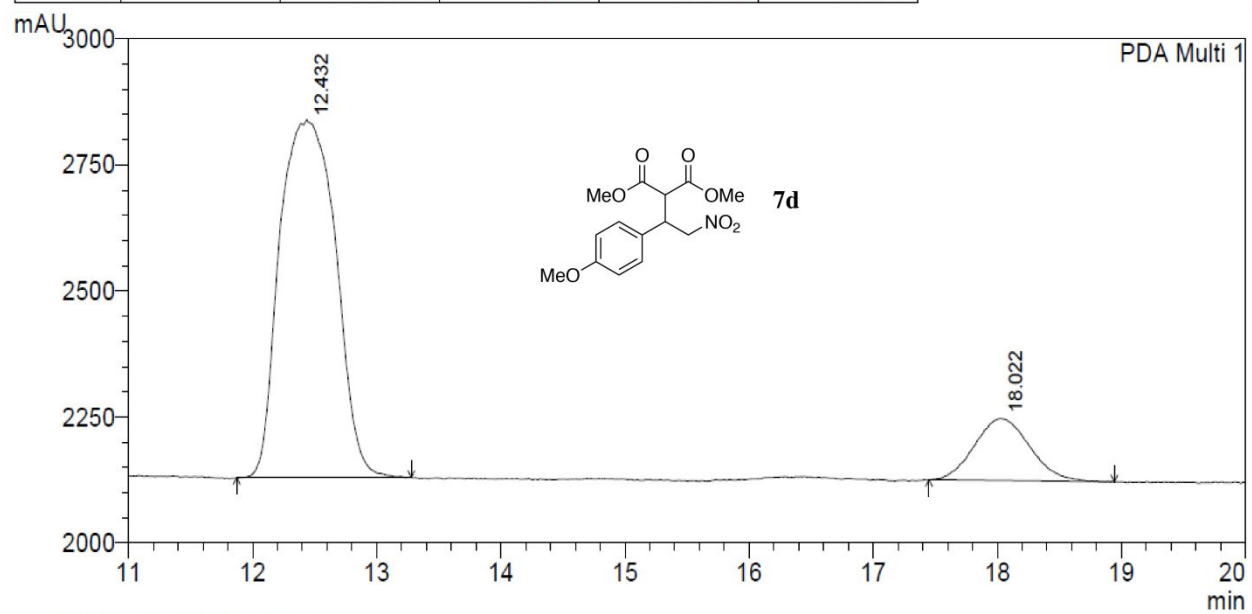

1 PDA Multi 1/220nm 4nm

PeakTable

PDA Ch1 220nm 4nm

| Peak# | Ret. Time | Area     | Height | Area %  | Height % |
|-------|-----------|----------|--------|---------|----------|
| 1     | 12.432    | 22262060 | 710105 | 85.509  | 85.321   |
| 2     | 18.022    | 3772708  | 122166 | 14.491  | 14.679   |
| Total |           | 26034767 | 832271 | 100.000 | 100.000  |

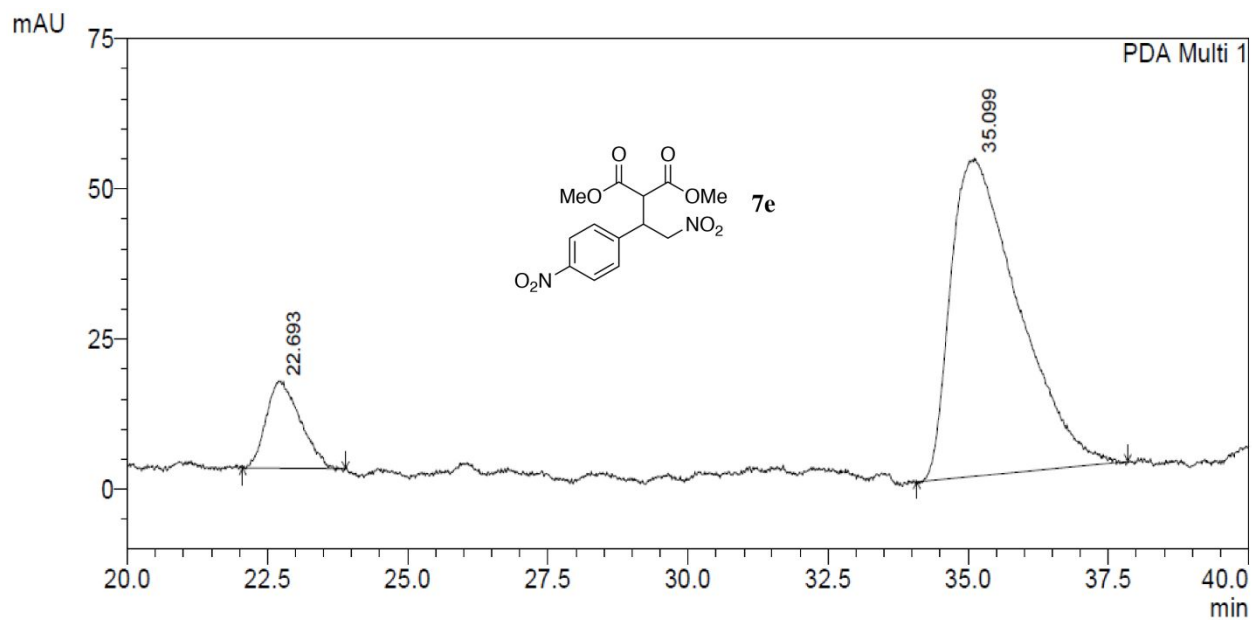

1 PDA Multi 1/220nm 4nm

PeakTable

PDA Ch1 220nm 4nm

| Peak# | Ret. Time | Area    | Height | Area %  | Height % |
|-------|-----------|---------|--------|---------|----------|
| 1     | 22.693    | 613772  | 14494  | 12.114  | 21.477   |
| 2     | 35.099    | 4453059 | 52992  | 87.886  | 78.523   |
| Total |           | 5066830 | 67486  | 100.000 | 100.000  |

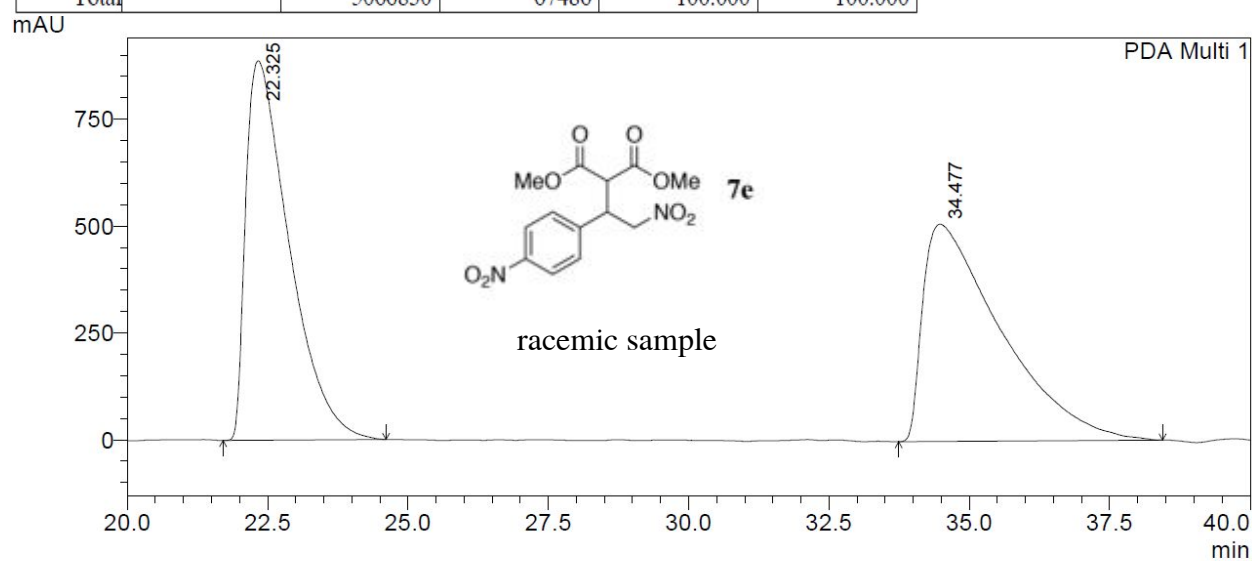

1 PDA Multi 1/220nm 4nm

PeakTable

PDA Ch1 220nm 4nm

| Peak# | Ret. Time | Area     | Height  | Area %  | Height % |
|-------|-----------|----------|---------|---------|----------|
| 1     | 22.325    | 47762796 | 887994  | 49.232  | 63.584   |
| 2     | 34.477    | 49253418 | 508575  | 50.768  | 36.416   |
| Total |           | 97016214 | 1396569 | 100.000 | 100.000  |

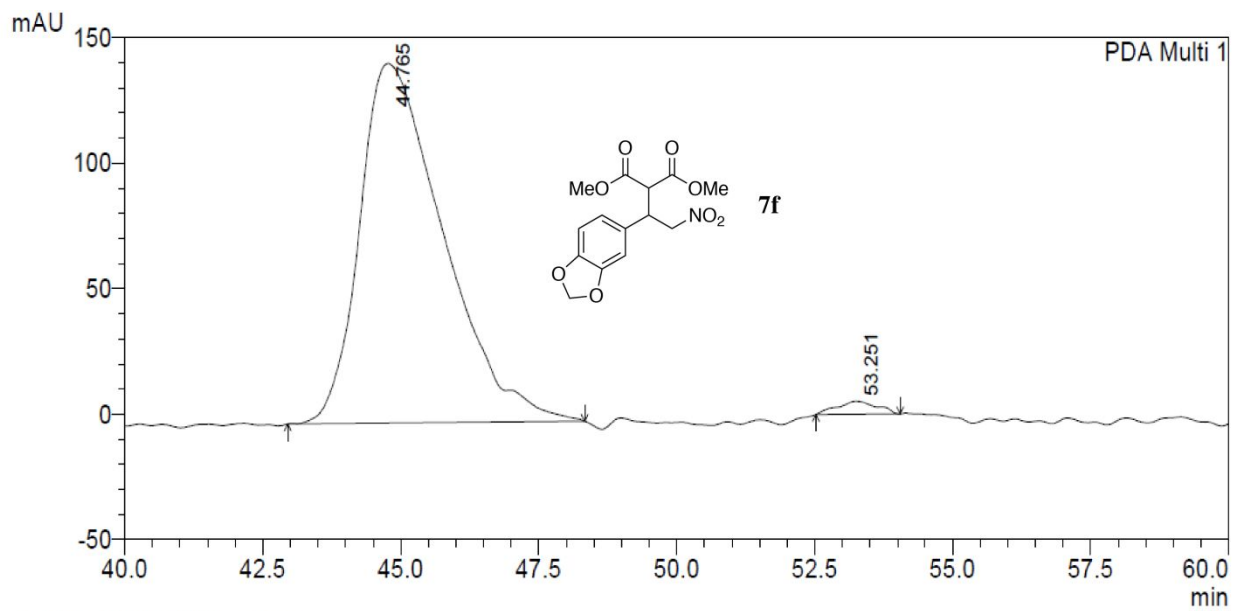

1 PDA Multi 1/220nm 4nm

PeakTable

PDA Ch1 220nm 4nm

| Peak# | Ret. Time | Area     | Height | Area %  | Height % |
|-------|-----------|----------|--------|---------|----------|
| 1     | 44.765    | 15100824 | 143230 | 98.312  | 96.516   |
| 2     | 53.251    | 259286   | 5171   | 1.688   | 3.484    |
| Total |           | 15360109 | 148401 | 100.000 | 100.000  |

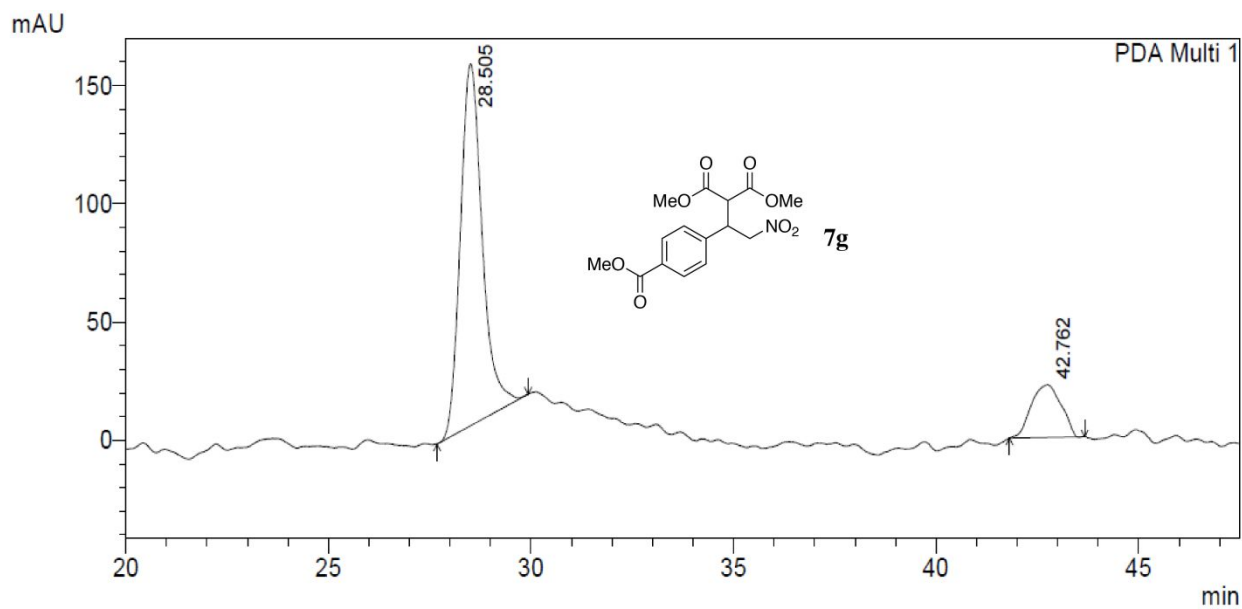

1 PDA Multi 1/210nm 4nm

PeakTable

PDA Ch1 210nm 4nm

| Peak# | Ret. Time | Area    | Height | Area %  | Height % |
|-------|-----------|---------|--------|---------|----------|
| 1     | 28.505    | 5756305 | 153144 | 83.368  | 87.296   |
| 2     | 42.762    | 1148382 | 22286  | 16.632  | 12.704   |
| Total |           | 6904687 | 175430 | 100.000 | 100.000  |



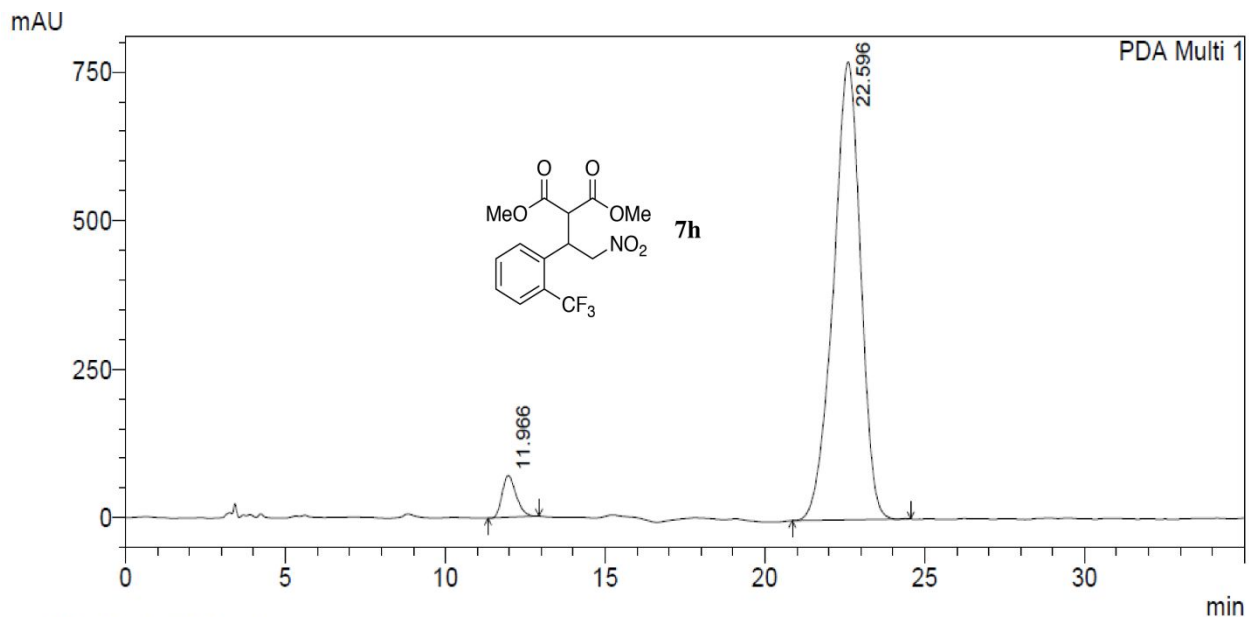

1 PDA Multi 1/220nm 4nm

PeakTable

PDA Ch1 220nm 4nm

| Peak# | Ret. Time | Area     | Height | Area %  | Height % |
|-------|-----------|----------|--------|---------|----------|
| 1     | 11.966    | 2141166  | 70585  | 4.490   | 8.393    |
| 2     | 22.596    | 45542705 | 770372 | 95.510  | 91.607   |
| Total |           | 47683871 | 840957 | 100.000 | 100.000  |

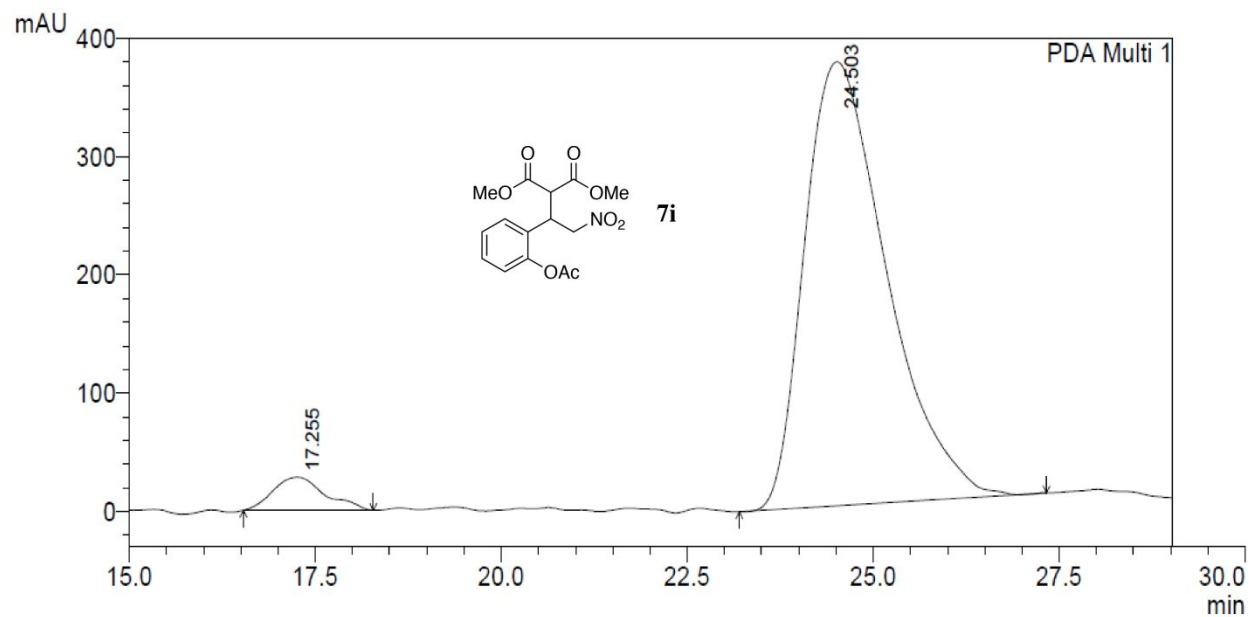

1 PDA Multi 1/220nm 4nm

PeakTable

PDA Ch1 220nm 4nm

| Peak# | Ret. Time | Area     | Height | Area %  | Height % |
|-------|-----------|----------|--------|---------|----------|
| 1     | 17.255    | 1375710  | 28163  | 4.560   | 6.975    |
| 2     | 24.503    | 28791723 | 375596 | 95.440  | 93.025   |
| Total |           | 30167433 | 403759 | 100.000 | 100.000  |

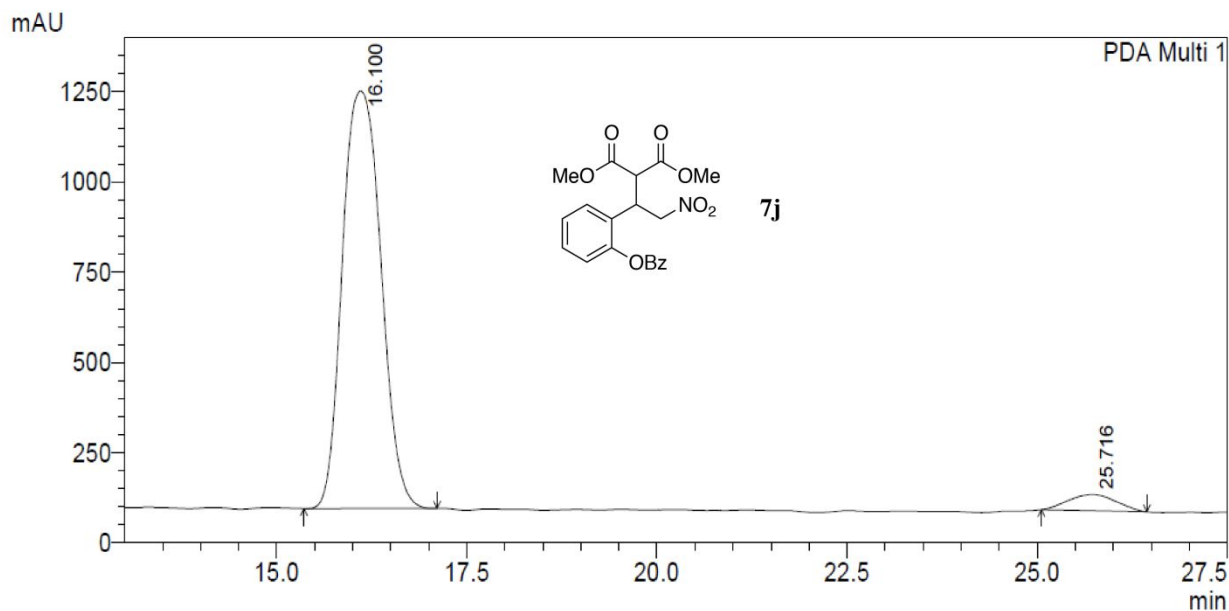

1 PDA Multi 1/220nm 4nm

PeakTable

PDA Ch1 220nm 4nm

| Peak# | Ret. Time | Area     | Height  | Area %  | Height % |
|-------|-----------|----------|---------|---------|----------|
| 1     | 16.100    | 40843400 | 1156471 | 95.462  | 96.274   |
| 2     | 25.716    | 1941795  | 44760   | 4.538   | 3.726    |
| Total |           | 42785195 | 1201231 | 100.000 | 100.000  |

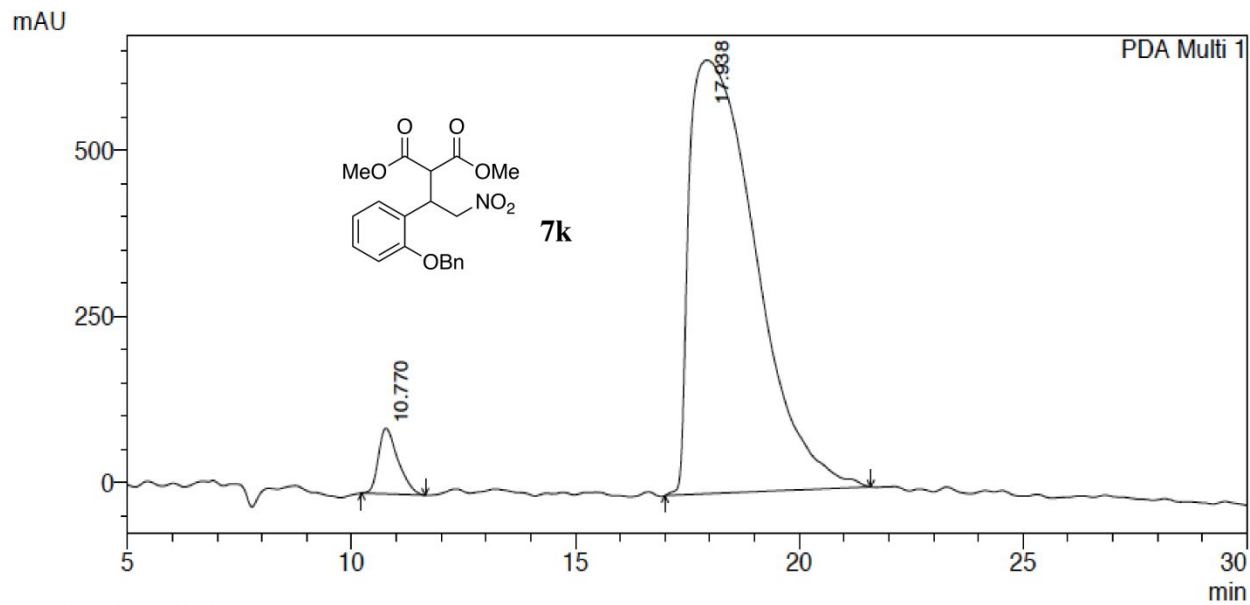

1 PDA Multi 1/220nm 4nm

PeakTable

PDA Ch1 220nm 4nm

| Peak# | Ret. Time | Area     | Height | Area %  | Height % |
|-------|-----------|----------|--------|---------|----------|
| 1     | 10.770    | 3007142  | 98777  | 4.264   | 13.143   |
| 2     | 17.938    | 67524994 | 652767 | 95.736  | 86.857   |
| Total |           | 70532135 | 751544 | 100.000 | 100.000  |

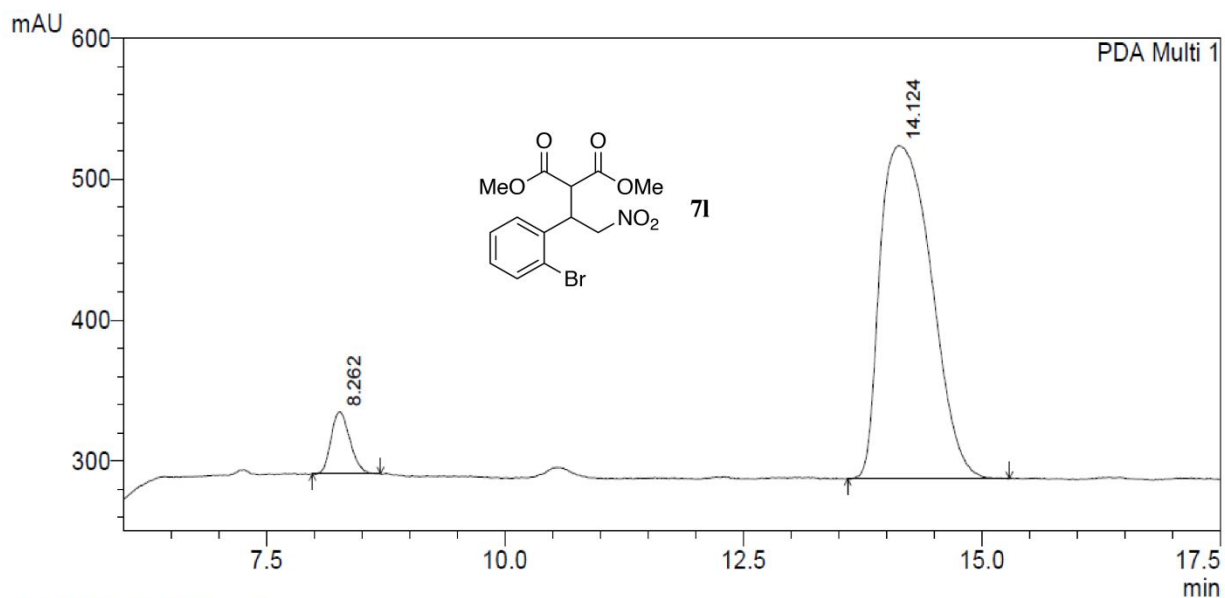

1 PDA Multi 1/220nm 4nm

PeakTable

PDA Ch1 220nm 4nm

| Peak# | Ret. Time | Area    | Height | Area %  | Height % |
|-------|-----------|---------|--------|---------|----------|
| 1     | 8.262     | 606589  | 44047  | 6.410   | 15.705   |
| 2     | 14.124    | 8855877 | 236412 | 93.590  | 84.295   |
| Total |           | 9462466 | 280459 | 100.000 | 100.000  |

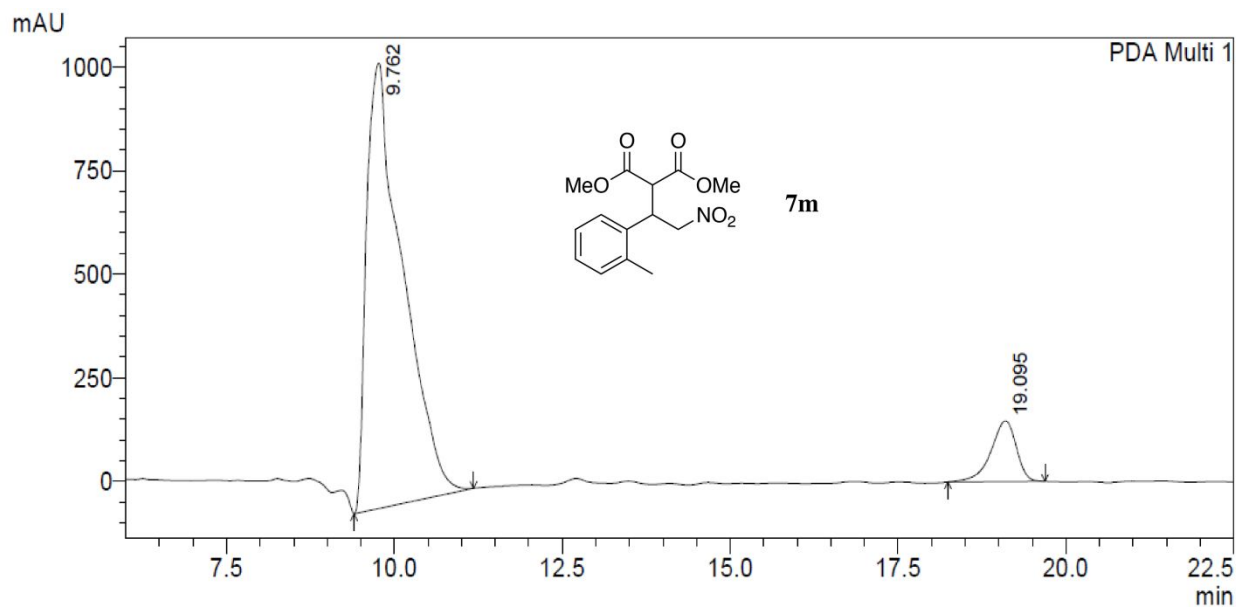

1 PDA Multi 1/220nm 4nm

PeakTable

PDA Ch1 220nm 4nm

| Peak# | Ret. Time | Area     | Height  | Area %  | Height % |
|-------|-----------|----------|---------|---------|----------|
| 1     | 9.762     | 40142061 | 1075203 | 91.179  | 88.002   |
| 2     | 19.095    | 3883720  | 146590  | 8.821   | 11.998   |
| Total |           | 44025781 | 1221793 | 100.000 | 100.000  |

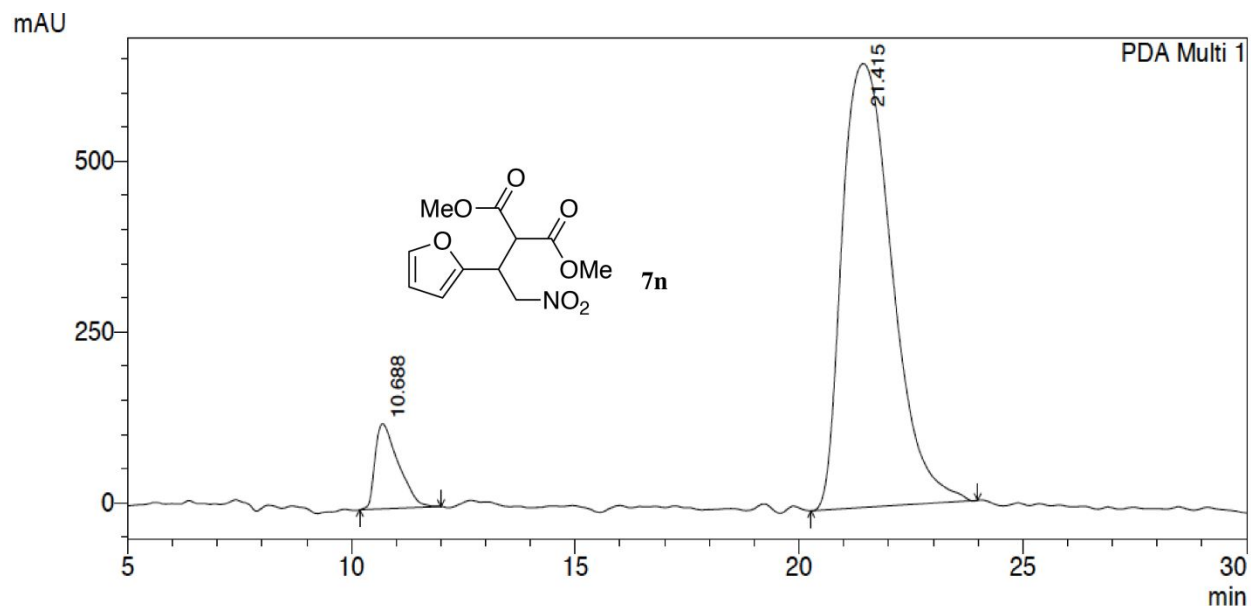

1 PDA Multi 1/220nm 4nm

PeakTable

PDA Ch1 220nm 4nm

| Peak# | Ret. Time | Area     | Height | Area %  | Height % |
|-------|-----------|----------|--------|---------|----------|
| 1     | 10.688    | 4501488  | 124344 | 8.196   | 16.073   |
| 2     | 21.415    | 50423476 | 649299 | 91.804  | 83.927   |
| Total |           | 54924964 | 773643 | 100.000 | 100.000  |

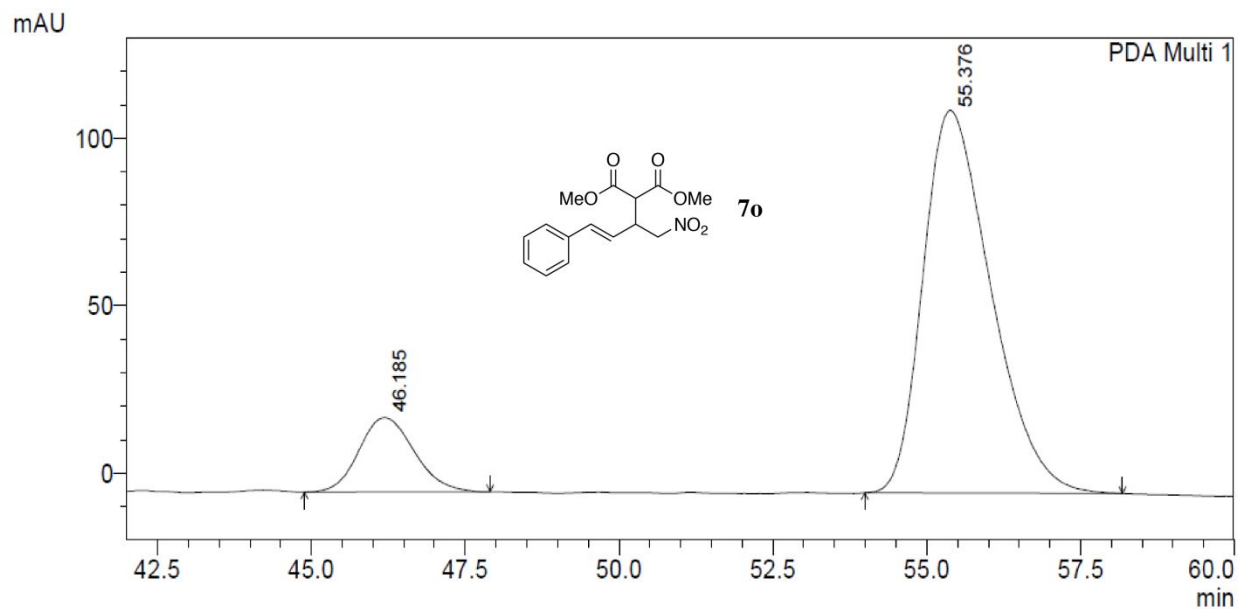

1 PDA Multi 1/210nm 4nm

PeakTable

PDA Ch1 210nm 4nm

| Peak# | Ret. Time | Area     | Height | Area %  | Height % |
|-------|-----------|----------|--------|---------|----------|
| 1     | 46.185    | 1385094  | 22211  | 13.593  | 16.267   |
| 2     | 55.376    | 8804661  | 114324 | 86.407  | 83.733   |
| Total |           | 10189755 | 136534 | 100.000 | 100.000  |

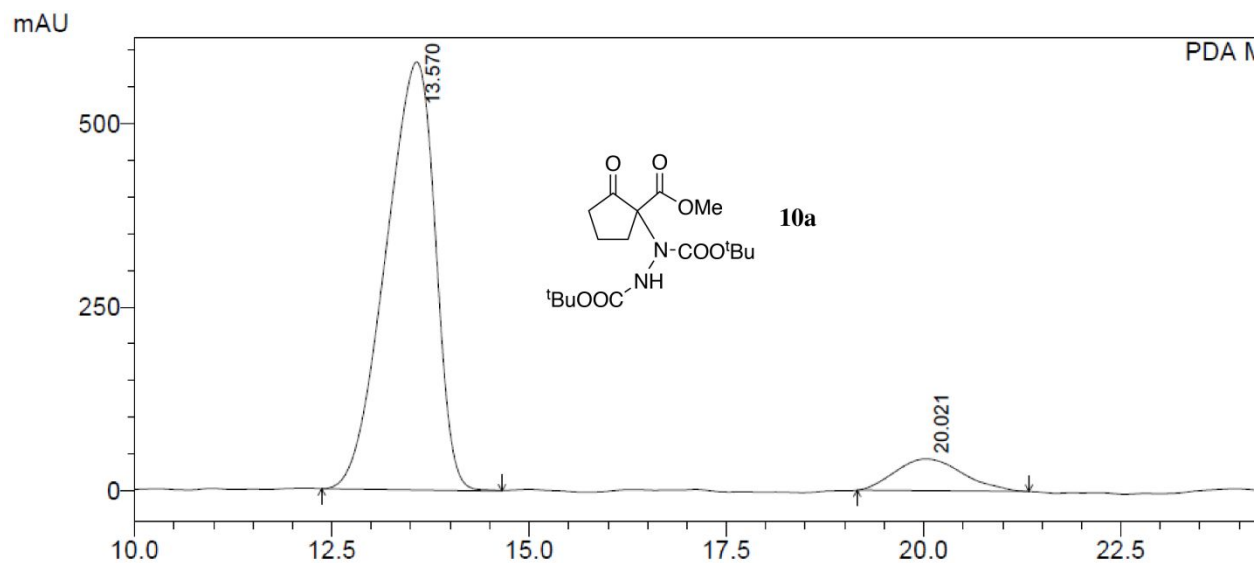

1 PDA Multi 1/210nm 4nm

PeakTable

PDA Ch1 210nm 4nm

| Peak# | Ret. Time | Area     | Height | Area %  | Height % |
|-------|-----------|----------|--------|---------|----------|
| 1     | 13.570    | 25405995 | 583120 | 90.747  | 93.079   |
| 2     | 20.021    | 2590411  | 43358  | 9.253   | 6.921    |
| Total |           | 27996406 | 626478 | 100.000 | 100.000  |

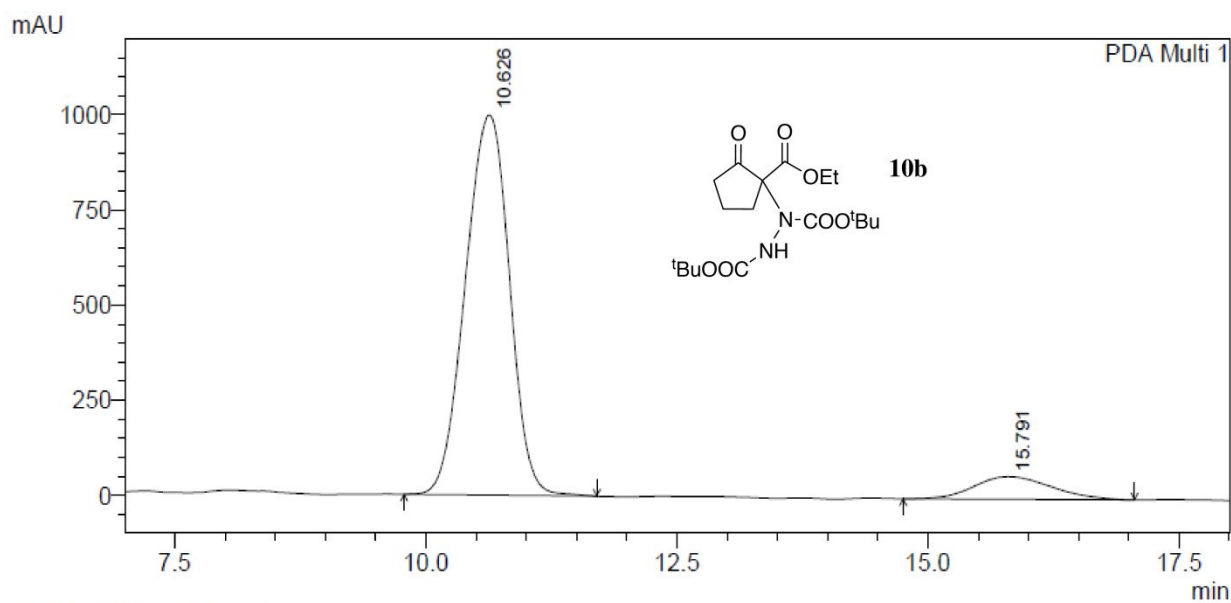

1 PDA Multi 1/210nm 4nm

PeakTable

PDA Ch1 210nm 4nm

| Peak# | Ret. Time | Area     | Height  | Area %  | Height % |
|-------|-----------|----------|---------|---------|----------|
| 1     | 10.626    | 30473749 | 998531  | 90.547  | 94.426   |
| 2     | 15.791    | 3181424  | 58947   | 9.453   | 5.574    |
| Total |           | 33655173 | 1057478 | 100.000 | 100.000  |

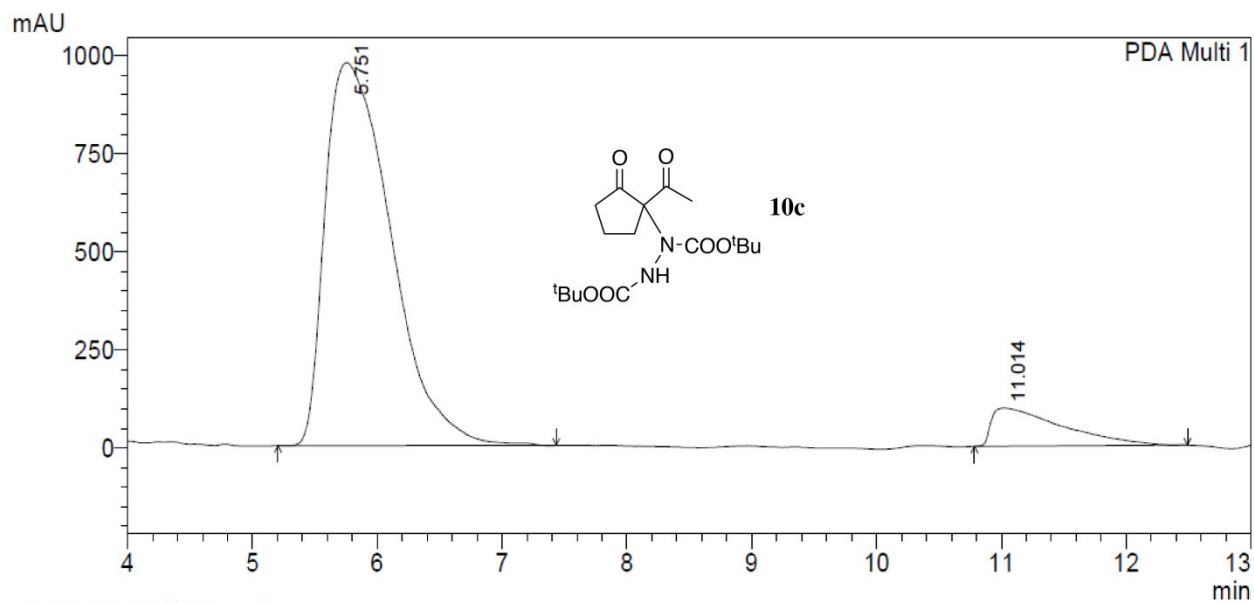

1 PDA Multi 1/210nm 4nm

PeakTable

PDA Ch1 210nm 4nm

| Peak# | Ret. Time | Area     | Height  | Area %  | Height % |
|-------|-----------|----------|---------|---------|----------|
| 1     | 5.751     | 35826029 | 976164  | 90.376  | 90.950   |
| 2     | 11.014    | 3815109  | 97136   | 9.624   | 9.050    |
| Total |           | 39641139 | 1073300 | 100.000 | 100.000  |

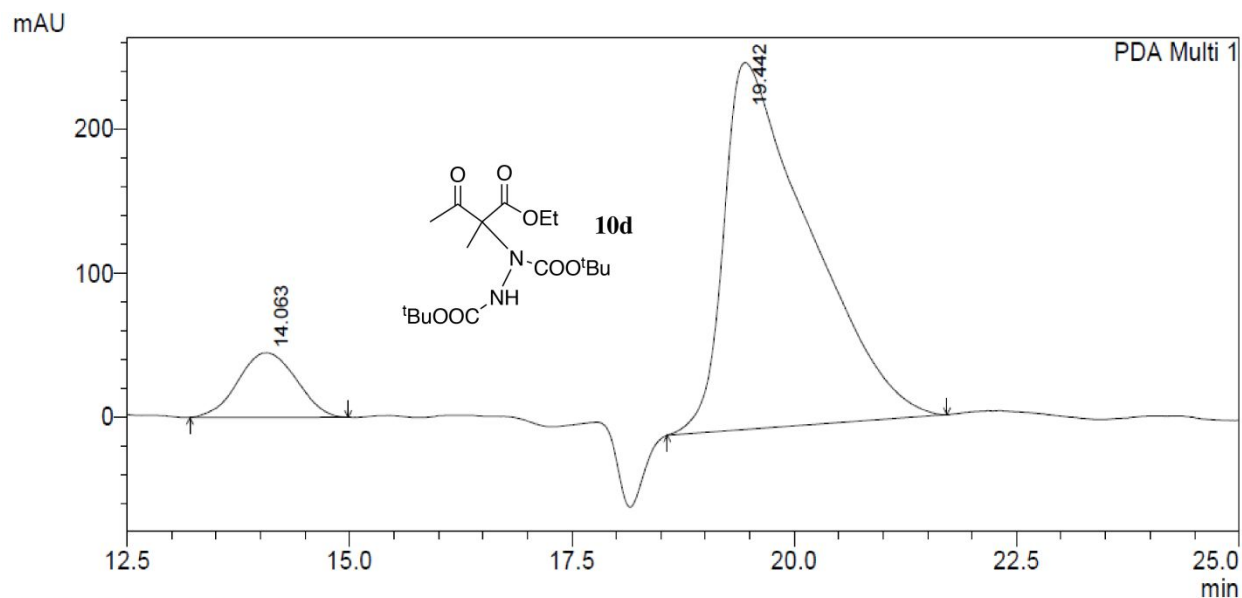

1 PDA Multi 1/210nm 4nm

PeakTable

PDA Ch1 210nm 4nm

| Peak# | Ret. Time | Area     | Height | Area %  | Height % |
|-------|-----------|----------|--------|---------|----------|
| 1     | 14.063    | 2052636  | 44962  | 10.682  | 15.010   |
| 2     | 19.442    | 17162791 | 254582 | 89.318  | 84.990   |
| Total |           | 19215427 | 299544 | 100.000 | 100.000  |

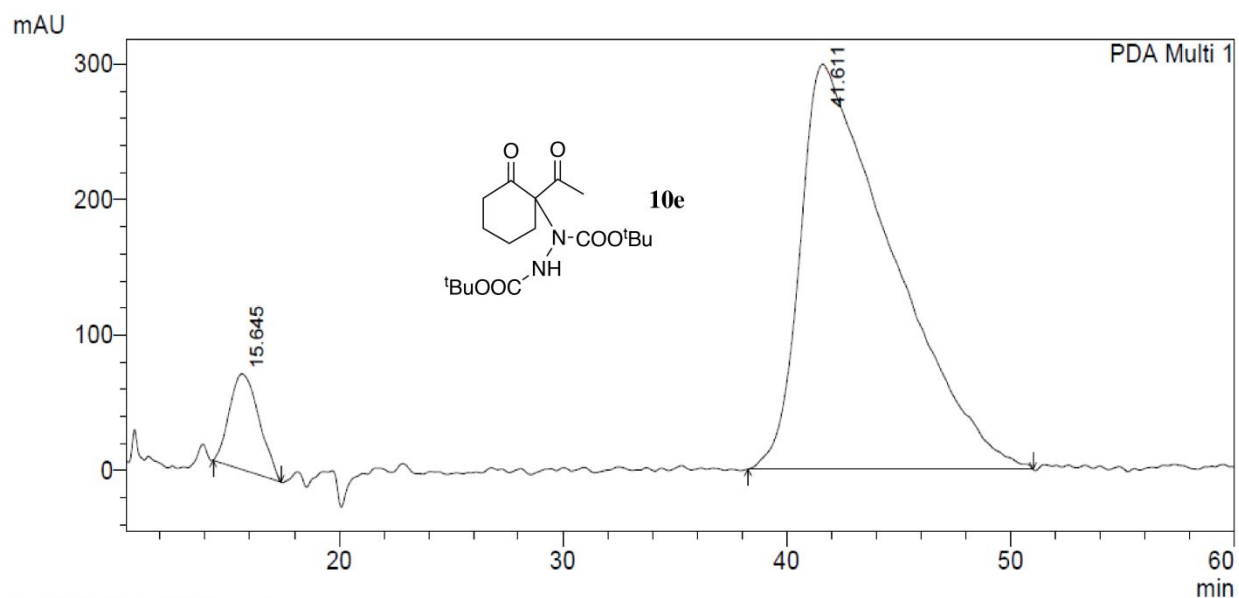

PeakTable

PDA Ch1 210nm 4nm

| Peak# | Ret. Time | Area     | Height | Area %  | Height % |
|-------|-----------|----------|--------|---------|----------|
| 1     | 15.645    | 6546369  | 70564  | 7.087   | 19.104   |
| 2     | 41.611    | 85825411 | 298801 | 92.913  | 80.896   |
| Total |           | 92371780 | 369365 | 100.000 | 100.000  |

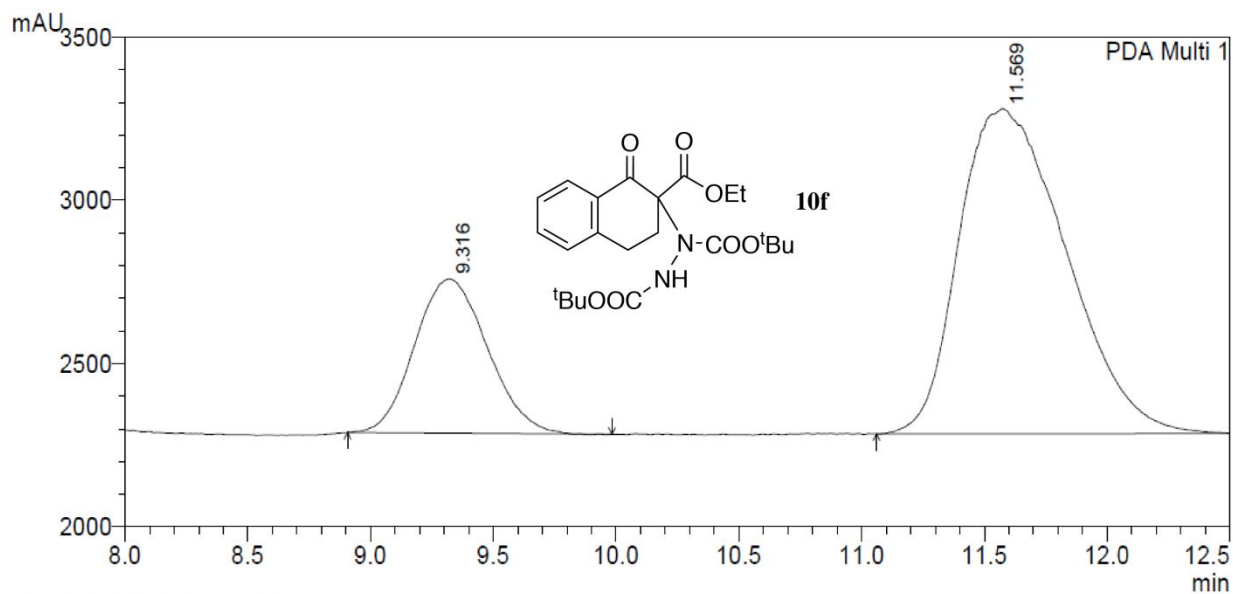

PeakTable

PDA Ch1 220nm 4nm

| Peak# | Ret. Time | Area     | Height  | Area %  | Height % |
|-------|-----------|----------|---------|---------|----------|
| 1     | 9.316     | 9744256  | 472899  | 24.366  | 32.157   |
| 2     | 11.569    | 30246826 | 997711  | 75.634  | 67.843   |
| Total |           | 39991081 | 1470610 | 100.000 | 100.000  |
